1 Feeding ecology of broadbill swordfish (*Xiphias gladius*) in the California Current

2

3 Antonella Preti<sup>1,2,3\*</sup>, Stephen M. Stohs<sup>3</sup>, Gerard T. DiNardo<sup>4</sup>, Camilo Saavedra<sup>5</sup>, Ken MacKenzie<sup>2</sup>,

4 Leslie R. Noble<sup>6</sup>, Catherine S. Jones<sup>2</sup>, Graham J. Pierce<sup>7,8</sup>

5

6 <sup>1</sup>Institute of Marine Studies, University of California Santa Cruz, Santa Cruz, California, USA

7 <sup>2</sup>Institute of Biological and Environmental Sciences, School of Biological Sciences, University of  
8 Aberdeen, Aberdeen, Scotland, UK

9 <sup>3</sup>NOAA Fisheries, Southwest Fisheries Science Center, La Jolla, California, USA

10

11 <sup>4</sup>SCS Global Services, Emeryville, California, USA

12 <sup>5</sup>Centro Oceanográfico de Vigo, Instituto Español de Oceanografía, Vigo, Spain

13

14 <sup>6</sup>Faculty of Biosciences and Aquaculture, Nord University, Bodø, Norway

15

16 <sup>7</sup>Instituto de Investigaciones Marinas, Vigo, Spain

17

18 <sup>8</sup>Oceanlab, University of Aberdeen, Newburgh, Aberdeenshire, Scotland, UK

19

20

21 \*Corresponding author

22 E-mail: [Antonella.Preti@noaa.gov](mailto:Antonella.Preti@noaa.gov) (AP)

23

## 24 **Abstract**

25 The feeding ecology of broadbill swordfish (*Xiphias gladius*) in the California Current was  
26 described based on analysis of stomach contents collected by federal fishery observers aboard  
27 commercial drift gillnet boats from 2007 to 2014. Prey were identified to the lowest taxonomic level  
28 and diet composition was analyzed using univariate and multivariate methods. Of 299 swordfish  
29 sampled (74 to 245 cm eye-to-fork length), 292 non-empty stomachs contained remains from 60 prey

30 taxa. Diet consisted mainly of cephalopods but also included epipelagic and mesopelagic teleosts.  
31 Jumbo squid (*Dosidicus gigas*) and *Gonatopsis borealis* were the most important prey based on the  
32 geometric index of importance. Swordfish diet varied with body size, location and year. Jumbo squid,  
33 *Gonatus* spp. and Pacific hake (*Merluccius productus*) were more important for larger swordfish,  
34 reflecting the ability of larger specimens to catch large prey. Jumbo squid, *Gonatus* spp. and market  
35 squid (*Doryteuthis opalescens*) were more important in swordfish diet in inshore waters, while *G.*  
36 *borealis* and Pacific hake predominated offshore. Jumbo squid was more important from 2007-2010  
37 than in 2011-2014, with Pacific hake the most important prey item in the latter period. Diet variation  
38 by area and year probably reflects differences in swordfish preference, prey availability, prey  
39 distribution, and prey abundance. The range expansion of jumbo squid that occurred during the first  
40 decade of this century may particularly explain their prominence in swordfish diet from 2007-2010.  
41 Some factors that may influence dietary variation in swordfish were identified. Standardization could  
42 make future studies more comparable for conservation monitoring purposes.

43

## 44 **Introduction**

45 Broadbill swordfish (*Xiphias gladius*, hereafter swordfish) are the most widely distributed  
46 billfish and occur worldwide in tropical, subtropical and temperate waters from around 50°N to 50°S  
47 [1-3]. They co-occur in the California Current Large Marine Ecosystem (CCLME), with several other  
48 upper trophic-level predators such as sharks and dolphins [4, 5]. Swordfish are productive predators,  
49 filling a similar ecosystem role to other large pelagic marine species, including other billfish species,  
50 sharks, tunas and dolphins [6]. Swordfish command a high economic value in both commercial and  
51 recreational fisheries in all oceans of the world [4]. In the CCLME, swordfish are landed in both the  
52 U.S.A. and Mexico. In the U.S.A., they are the primary target of the drift gillnet (DGN) fishery that

53 operates mainly in the U.S. waters of the Southern California Bight (SCB). Swordfish are also landed  
54 in the historic harpoon fishery, and more recently in the deep-set buoy gear fishery that was developed  
55 as a low-bycatch method to target swordfish during daylight hours [7-9].

56 The swordfish population in the North Pacific is assessed as two stocks, divided by a boundary  
57 extending from Baja California (25°N x 110°W) to 165°W at the Equator [10, 11]. These are the  
58 Western and Central North Pacific Ocean (WCNPO) stock and the Eastern Pacific Ocean (EPO) stock  
59 [3, 12, 13]. The most recent stock assessment indicated that the WCNPO stock, which is the source of  
60 the DGN fleet swordfish catch, was neither overfished nor experiencing overfishing [13].

61 Swordfish are well adapted for survival in a wide range of water temperatures from 5°C to  
62 27°C; however, they are generally found in areas with sea surface temperatures (SST) above 13°C  
63 [14]. They are highly fecund and do not seem to have discrete spawning grounds or seasons [15].  
64 Swordfish migration patterns have not been described in peer-reviewed publications, although tag  
65 release and recapture data indicate an eastward movement from the central Pacific, north of Hawaii,  
66 towards the U.S. West Coast [4]. Swordfish tend to concentrate near underwater features, like  
67 seamounts and banks, and near oceanographic boundaries where sharp gradients of temperature and  
68 salinity exist [1], such as convergence zones and strong thermoclines [16]. These regions are known  
69 for having a relatively high abundance of forage species [17, 18]. Swordfish aggregate along these  
70 productive thermal boundaries between cold upwelled water and warmer water masses to forage [16,  
71 19] and do not travel far during the first year of life [20].

72 Further insights into foraging come from information on vertical movement patterns.  
73 Swordfish display diurnal vertical migration, diving below the deep scattering layer by day and  
74 returning to shallower depths by night. Daytime depth distribution is hence more variable, including  
75 periods of basking behavior when swordfish are visibly present at the ocean surface, compared to a

76 narrow depth range at night when it is concentrated near the surface [21-23]. During dives, swordfish  
77 can reach depths of up to 1000 m, indicating a tolerance of low water temperatures (c. 5°C).

78 Like other billfish, swordfish have a number of adaptations that enhance foraging ability. They  
79 use their large bill to incapacitate and kill prey [1, 24]. Though they swim relatively fast, their large  
80 size limits maneuverability [25]. Partial endothermy and large eyes enhance foraging at depth [26].

81 Swordfish have also evolved a specialized muscle that functions as a brain heater. This  
82 mechanism allows them to function in cold water, which is essential to a fast-swimming predator that  
83 generally hunts on the cooler side of boundaries between oceanic water masses [1, 26-28].

84 Endothermy also has energy costs, suggesting that swordfish may have higher energy needs than  
85 otherwise similar heterothermic species [24]. Thus, they need to catch more energy-rich prey or  
86 consume a greater quantity of prey than would be necessary if they were ectothermic.

87 Although they can use their sword to subdue prey items for easier consumption [29],  
88 swordfish lack teeth and ingest their food whole, physically limiting the size of prey they can handle.  
89 By contrast, sharks use their sharp teeth to tear and consume very large prey piecemeal. The  
90 combination of large size, endothermy, and the lack of slicing teeth possibly places swordfish closer  
91 to dolphins rather than sharks in terms of foraging ecology. Swordfish diets and prey composition  
92 have been found to vary by ecosystem. In some regions, swordfish diets presented a prevalence of  
93 teleosts, while in others cephalopods were most prominent. In a few areas, a similar proportion of  
94 both prey item groups were observed (Table 1). Several studies considered only the cephalopod  
95 portion of the swordfish diet and, therefore, are not listed in Table 1 [30-34].

96

97

98

99 **Table 1.** Proportion of teleosts and cephalopods, by area, in diet of swordfish based on published  
 100 studies. ‘\*’ = highest proportion; W=Western; N=North E=Eastern; S=Southern; Teleo=teleosts;  
 101 Ceph=cephalopods.

| Area                                           | Teleo | Ceph | Authors                   |
|------------------------------------------------|-------|------|---------------------------|
| W. N. Atlantic                                 | *     | *    | [29], [35-48]<br>[49, 50] |
| E. N. Atlantic                                 | *     | *    | [51-53]<br>[54, 55]       |
| E. Central Atlantic                            | *     | *    | [56, 57]                  |
| E. Tropical Atlantic                           |       | *    | [58]                      |
| Tropical Atlantic                              | *     |      | [59]                      |
| W. Equatorial Indian Ocean                     | *     |      | [60]                      |
| E. N. Pacific<br>(Channel Islands, California) | *     |      | [61]                      |
| E. N. Pacific<br>(Baja California)             | *     | *    | [62]<br>[63]              |
| Central N. Pacific<br>(Hawaii)                 |       | *    | [64]                      |
| E. Pacific (Chile)                             | *     | *    | [65-69]<br>[70]           |
| E. Pacific (Ecuador)                           |       | *    | [71, 72]                  |
| S. Pacific                                     | *     |      | [73]                      |
| W. N. Pacific                                  |       | *    | [74]                      |
| E. Mediterranean Sea                           |       | *    | [75]                      |
| S. Aegean Sea                                  | *     |      | [76]                      |
| E. Australia                                   |       | *    | [77]                      |

102  
 103 Southern California is a foraging ground within the CCLME where swordfish from various  
 104 regions of the eastern and central north Pacific aggregate. While the CCLME is known to be an  
 105 important foraging ground for swordfish during certain times of year, the feeding habits of swordfish

106 in this region are not well documented, especially in recent years. To date, there have been two  
107 extensive studies of swordfish feedings habits in the CCLME [62, 63] as well as a few other less  
108 comprehensive studies [61, 78, 79]. This study aims to expand our knowledge of the feeding ecology  
109 of swordfish in the CCLME by analyzing the: (1) relative importance of different prey types; and (2)  
110 dietary variation inter-annually, by sub-period (within years), by area, and in relation to body size.  
111 The findings of this study can serve to inform the development of alternative approaches to better  
112 manage this economically and ecologically important species.

113

## 114 **Methods**

### 115 **Sampling at sea**

116 Federal fishery observers aboard DGN vessels collected swordfish stomachs during the 2007-  
117 2014 fishing seasons. The DGN vessels operate within the U.S. EEZ, primarily in the SCB from  
118 August 15 through January 31. Because the season spans two calendar years, ‘year’ for this study  
119 refers to the fishing season, e.g., 2007 refers to August 2007 through January 2008. Sets are  
120 conducted using 1.8 km long drift gillnets extending from roughly 12 m to 100 m below the surface.  
121 DGN boats are active at night, setting nets within one hour before sunset and hauling in within one  
122 hour after sunrise for an average net-soaking time of approximately 12 hours. Hauling can then take 4  
123 to 6 hours.

124 Stomach samples were excised at sea, the oesophageal and pyloric ends secured with plastic  
125 cinch ties, and the stomachs then bagged, labeled and frozen. Additional data recorded at sea included  
126 set and haul-back times, water depth, SST, date, location and fish size.

127

### 128 **Processing in the laboratory**

129 Stomachs were thawed, tamped with absorbent paper to remove excess water, and weighed  
130 full. Contents were then removed and the empty stomach lining weighed to obtain overall contents  
131 weight. Solid material and slurry were rinsed and sorted using a series of mesh screen sieves with  
132 mesh sizes 9.5 mm, 1.4 mm, and 0.5 mm for ease of rinsing mid-sized food boluses without losing  
133 some of the smallest items, such as fish otoliths. Degree of prey digestion was estimated using a six-  
134 point scale as follows: (1) Fresh: head, body, skin and most fins intact though some individuals may  
135 be in pieces (i.e., sliced on capture); (2) Intermediate: body and most flesh intact; fins, scales and

136 some or all cephalopod skin may be digested; (3) Intact skeleton from head to hypural plate or  
137 body/mantle/carapace intact, or easily reconstructed to obtain standard length measurements; (4)  
138 Unmeasurable body parts only: hard parts cannot be reassembled to obtain standard measurements,  
139 but higher taxon or species group still identifiable; (5) Digested but identifiable to a higher taxonomic  
140 level (e.g., family); and (6) Fully digested unidentifiable material; slurry. Prey items were then  
141 separated, identified to the lowest possible taxonomic level using taxonomic keys, enumerated,  
142 measured and weighed. Fish otoliths and the upper and lower squid beaks were counted in pairs when  
143 possible, with the highest count representing the minimum number present. These numbers were  
144 added to the numbers of intact prey. Weights were grouped by taxon (not individually), while lengths  
145 of all intact individuals within a taxon were measured. Weight of a taxon was the weight of the  
146 undigested and partially digested items found in the stomach and not based on back-calculations of  
147 weight at the time of ingestion from measurements of hard parts. This approach was chosen because  
148 substantial amounts of undigested food remains were found and it is commonly used in studies of fish  
149 stomach contents [80]. A consequence of this approach is that prey eaten longer ago contribute less to  
150 the weight.

151 Partial remains comprising only large chunks (i.e., fist size or greater) or pieces of fish in  
152 digestive state 1 or 2 were considered to be the result of swordfish feeding on prey caught in the  
153 driftnet and therefore were discarded from the analysis.

154 Genetic analyses were used to identify diet items that could not be identified visually. Tissue  
155 samples for DNA extraction were taken from the interior of the sample to minimize cross  
156 contamination with other prey. DNA was extracted using a DNeasy blood and tissue kit (Qiagen)  
157 following the manufacture's protocols. The "Barcode" region of the mitochondrial cytochrome c  
158 oxidase I (COI) gene was amplified by polymerase chain reaction (PCR) following [81], using their



159 COI-3 primer set with M13 tails. No template negative controls were run for each PCR batch to  
160 monitor for potential DNA contamination of reagents. PCR products were sequenced using BigDye v  
161 3.1 dye terminator chemistry (Life Technologies), using the sequencing primers M13F(-21) and  
162 M13R(-27) following manufacturers' protocols. Aligned and edited sequences were entered into the  
163 BOLD v4 [82] and matches greater than 98% identity to a single taxon were considered to be the  
164 correct species assignment for the prey item.

165 Secondary prey items (prey of prey) were discarded when found associated with the stomachs  
166 of fresh prey (e.g., euphausiids in the stomachs of Pacific hake). In other cases, the presence of  
167 secondary prey cannot be ruled out. This is a common issue in diet analysis but is generally  
168 considered to have only minor consequences for the estimated biomass of different prey categories  
169 [62, 83].

170

## 171 **Data analysis**

172 Randomized cumulative curves depicting the relationship between number of prey taxa  
173 detected and sample size (rarefaction curves) were constructed using the Vegan package [84] in R  
174 statistical software [85] to determine the extent to which the sample size characterize the diet [86-90].  
175 For this analysis, the order in which stomach contents were analyzed was randomized 100 times and  
176 the mean ( $\pm 2$  standard deviations) number of prey taxa observed was plotted against the number of  
177 stomachs examined. A curve approaching an asymptote with low variability indicates that the number  
178 of stomachs examined is sufficient to characterize the diet [86]. To complement this visual approach,  
179 a method proposed by [91] was used to assess whether the curve had reached an asymptote.  
180 Specifically, a straight line was fitted to the rightmost 4 points of the species accumulation curve. If  
181 the slope did not differ significantly from zero, then the species accumulation curve was inferred to

182 have reached an asymptote. For constructing such cumulative prey curves, [91] lumped prey into  
183 higher-level taxonomic categories (e.g., crustaceans, teleosts, polychaetes). By contrast, we used the  
184 lowest taxonomic level to which prey had been identified, making it much less likely that the curves  
185 would reach an asymptote and assuring that the curves gave a more reliable picture of the adequacy of  
186 sample size to fully describe diet. Prey identified to species as well as unidentified categories were all  
187 included in the analysis. In general, if the proportion of unidentified prey species in the diet is low, the  
188 rarefaction curve tends to be a good guide to how many samples are required to sufficiently  
189 characterize diet. If the proportion of unidentified species is high, confidence in the curve will be  
190 lower, but it can remain a helpful tool.

191 The importance of each prey type was summarized using three standard Relative Measures of  
192 Prey Quantities (RMPQs): percent frequency of occurrence (%F); percent composition by number  
193 (%N); and percent composition by weight (%W) [80, 83, 92, 93]. Stomachs which were empty or  
194 contained only slurry and/or detritus were not considered when calculating percentages. Two  
195 combined dietary indices (in both cases expressed both in original form and as percentages) were also  
196 used to rank prey taxon importance, namely the geometric index of importance (GII) and percentage  
197 GII (%GII) [94], and the index of relative importance (IRI) and percentage IRI (%IRI) [92]. These are  
198 useful indices to rank prey importance since they take into account both numerical and weight-based  
199 importance to the diet. Some authors favor GII [95-97] and others favor IRI [98-100], while some  
200 doubt the merits of all such combined indices (see [83] and references therein). Here, each method  
201 was used to examine only the ranking of prey types, because the two combined index values are not  
202 directly comparable.

203 The GII, in its simplified form, is calculated as:

204

$$GII_j = \frac{\left( \sum_{i=1}^n V_i \right)_j}{\sqrt{n}}$$

205 where  $GII_j$  = index value for the  $j$ -th prey category,  $V_i$  = the magnitude of the vector for the  $i$ -th  
206 RMPQ of the  $j$ -th prey category, and  $n$  = the number of RMPQs used in the analysis (in this case 3,  
207 since we used %W, %N and %F).

208 The % $GII_j$  converts  $GII_j$  values to a percentage scale:

209

$$\%GII_j = \frac{\left( \sum_{i=1}^n V_i \right)_j}{n}$$

210 The IRI for the  $j$ -th prey category is calculated as:

211

$$IRI_j = (\%N_j + \%W_j) * \%F_j$$

212 The IRI value was also converted to a percentage, which is arguably more useful for comparisons  
213 among studies [101]:

214

$$\%IRI_j = 100 IRI_j / \sum_{j=1}^n IRI_j$$

215 To analyze overall variation in swordfish diet in relation to body size, fishing area (within the  
216 SCB and beyond the SCB areas) and year, samples were categorized into groups: (1) ‘Small’ (< 165  
217 cm) and ‘Large’ ( $\geq$  165 cm) size categories, based on eye-to-fork length (EFL), with the cut-off  
218 chosen to produce similar samples sizes for each group; (2) ‘Within SCB’ (east of 120° 30’W) and  
219 ‘Beyond SCB’ (west of 120° 30’W) (this longitude approximately separates the waters in the SCB  
220 where the northward flowing California Counter Current influences nearshore oceanography and the  
221 more offshore waters affected by the California Current as it moves southward); and (3) ‘Year’ was

222 assigned based on the DGN fishing season, August 15 through January 31, such that all specimens  
223 collected in a single fishing season were assigned the year of the season's start date.

224 Differences in diet across size-, area- and year-groups were quantified and their statistical  
225 significance estimated using bootstrap simulations. In each case of the six most important prey items  
226 overall, 1000 bootstrap replicates of GII values for both groups were generated (e.g., GII for jumbo  
227 squid in stomachs of (A) small and (B) large fish) and, for each replicate, it was noted whether GII  
228 was higher in the first subgroup or in the second subgroup. If the GII value in A was higher than the  
229 GII value in B in more than 95% of replicates, we argue that the species is significantly more  
230 important in the diet of group A than in the diet of group B (and vice versa). All measures were  
231 calculated using R statistical software [85]. No index value was estimated if the sample size was less  
232 than 10, since small samples are known to produce biased values [102].

233 To summarize relationships between diet composition in terms of the importance of different  
234 prey items (response variables) and potential explanatory factors, redundancy analysis (RDA) was used,  
235 as implemented in Brodgar 2.7.4 ([www.brodgar.com](http://www.brodgar.com)). Rare prey taxa that were found in less than 4  
236 stomachs were removed prior to this analysis. The swordfish sample comprised 289 individuals (samples  
237 with food and EFL available) and the effects of 7 explanatory variables were considered: area (east and  
238 west of 120°30'W), time period (2007, 2008-2010, 2011-2014), half-year (August 15 through November  
239 7 and November 8 through January 31), predator size (EFL) and SST (which was available for each haul  
240 and was measured at the beginning of the set). Years were grouped to avoid an excessive number of  
241 explanatory variables in relation to the sample size and to retain reasonable sample sizes per group.  
242 Categorical variables were replaced by “dummy” variables. That is, a variable with X categories is  
243 replaced by X-1 binary (0-1) variables, each signifying that the original categorical variable takes or does  
244 not take a particular value. In all analyses, only X-1 binary variables are entered because once the value

245 of all these is specified the value of the last one is already known. Data were transformed using Chord  
246 distance [103-105], a method that allows assignment of a low weighting to rare prey species.

247 To examine the relationship between the importance of individual prey types and the various  
248 explanatory variables, Generalized Additive Modelling (GAM) was used. GAM is an extension of the  
249 regression-based statistical modelling approach that is suitable when the response variable is not  
250 (necessarily) normally distributed and there is no reason to expect linear relationships between response  
251 and explanatory variables. In linear regression, the slope values (regression coefficients) quantify the  
252 relationships between the response variable and each of the explanatory variables, while GAM uses  
253 “smoothing” functions to capture these relationships. The default smoothing function used in the GAM  
254 function in the *mgcv* package in R [106] (and also used in Brodgar statistical software) is the thin plate  
255 regression spline. The complexity of the resulting curve is normally determined by the fitting routine  
256 (“cross-validation”) but can be restricted by the user, and is summarized in the “degrees of freedom”,  
257 with high values indicating more complex curves. If the degrees of freedom of a smoother are equal to or  
258 close to 1, this implies an approximately linear function. When applying GAM, it is necessary to  
259 consider the distribution of the response variable, which is likely to depend on the nature of the variable  
260 studied. In this study, the data are in the form of prey counts for the main prey species. Some prey  
261 occurred in large numbers and the distribution of the number of prey per stomach is likely to be strongly  
262 right-skewed, hence a negative binomial distribution was used. The number of knots, *k*, was limited to 4  
263 to avoid overfitting in the case of explanatory variables for which relatively simple relationships would  
264 be expected, e.g., body size. The forwards selection method was used for model fitting. To avoid the  
265 model misspecification, the optimal GAM model was validated by checking for influential data points  
266 and looking for patterns in the distribution of residuals [107, 108]. GAMs were fitted using count data  
267 for all of the top seven ranked prey items (based on GII).

## 268 **Results**

### 269 **Sample composition**

270 A total of 299 broadbill swordfish (*Xiphias gladius*) stomachs were collected during 103  
271 observed DGN trips in the CCLME (Fig 1). Samples were collected from 2007-2014 throughout the  
272 CCLME but especially in the southeast, where the fishing is mainly concentrated. SST at the time of  
273 sample collection ranged from 14.3°C to 21.9°C (mean 17.9°C). Swordfish ranged in size from 74 to 245  
274 cm EFL (Fig 2). [109] provided median body size at sexual maturity ( $L_{50}$ ) for males (102 cm  $\pm$  2.5 (95  
275 % CI) cm EFL) and females (144  $\pm$  2.8 cm EFL). Based on these estimates, almost all the animals in this  
276 study were above the typical size at maturity for males and a majority were above the typical size at  
277 maturity for females; as noted above, sex was not determined. Of the 299 swordfish stomachs examined,  
278 292 contained food remains belonging to 60 different prey taxa overall. Ninety-one percent of the food  
279 items were in an advanced state of digestion (stages 4 and 5).

280

281 **Fig 1.** Collection areas of swordfish used for diet analysis. Number of samples is indicated by  
282 greyscale in the legend. Map shows the northern part of the CCLME that extends to the tip of Baja  
283 California.

284

285 **Fig 2.** Length-frequency distribution of swordfish sampled in the diet study.  $N=295$ . *Arrows* indicate  
286 typical sizes at maturity for males and females [109]. Eye-to-fork length is measured in cm. (Size was  
287 not determined for 4 individuals of the 299 sampled).

288

289

290

## 291 **Sample size sufficiency**

292           The cumulative prey curve did not reach an asymptote for the swordfish stomachs analyzed  
293 (Fig 3). The terminal portion of the curve (4 last points) had a slope that differed significantly from  
294 zero ( $p = 0.0009$ ). Nevertheless, the fact that the curve starts to asymptote indicates that the majority  
295 of prey taxa present in the diet of the swordfish (at the temporal and spatial scale of the present study)  
296 are likely to be represented in these analyses.

297

298 **Fig 3.** Cumulative prey curve (rarefaction curve) for swordfish (prey identified at the lowest possible  
299 taxonomic level).

300

## 301 **Indices of prey importance**

302           Table 2 lists each of the RMPQs for all prey found, as well as the calculated GII, %GII, IRI  
303 and %IRI values. Rankings of prey taxa based on GII and IRI were nearly identical. Jumbo squid  
304 (*Dosidicus gigas*) was the most important prey item by weight, number and according to the two  
305 combined indices. The boreopacific gonate squid (*Gonatopsis borealis*) was the second most  
306 important prey according to GII and IRI, and the most important by frequency of occurrence. Other  
307 important squid prey included *Abraliopsis* sp., *Gonatus* spp. and market squid (*Doryteuthis*  
308 *opalescens*). Pacific hake (*Merluccius productus*) was the highest ranked teleost prey species, ranked  
309 sixth by GII. Swordfish also preyed on barracudinas (Paralepididae), several species of coastal pelagic  
310 fishes (jack mackerel *Trachurus symmetricus*, Pacific sardine *Sardinops sagax*, Pacific saury  
311 *Cololabis saira*, northern anchovy *Engraulis mordax*), luvar (*Luvarus imperialis*), king-of-the-salmon  
312 (*Trachipterus altivelis*), halfmoon (*Medialuna californiensis*) and seven species of the family

313 Myctophidae (Table 2). Cuts and punctures were apparent on several of prey items.

314

315 **Table 2.** Quantitative prey composition of the broadbill swordfish (*Xiphias gladius*) in the CCLME.

316 A total of 299 stomachs (292 containing food and 7 without food) was examined. Prey items are

317 shown in order of decreasing GII value. *W* = weight (g) for the given prey taxon, %*W* is the same

318 value expressed as a percentage of the total weight summed across all prey taxa, *N* = number of prey

319 individuals, *F* = frequency of occurrence (number of stomachs in which the prey taxon occurred), %*F*

320 = frequency of occurrence expressed as a percentage of the number of (non-empty) stomachs

321 examined; GII = geometric index of importance  $(\%W + \%N + \%F) / \sqrt{3}$ ; IRI = index of relative

322 importance  $(\%W + \%N) * \%F$ .

323

| Prey Taxon                                                   | <i>W</i> (g) | % <i>W</i> | <i>N</i> | % <i>N</i> | <i>F</i> | % <i>F</i> | GI    | %GI   | IRI     | %IRI  |
|--------------------------------------------------------------|--------------|------------|----------|------------|----------|------------|-------|-------|---------|-------|
| <b>Jumbo squid, <i>Dosidicus gigas</i></b>                   | 131892.7     | 53.27      | 1061     | 20.23      | 173      | 59.25      | 76.64 | 44.25 | 4354.96 | 56.47 |
| <b>Boreopacific gonate squid, <i>Gonatopsis borealis</i></b> | 19949.8      | 8.06       | 884      | 16.86      | 182      | 62.33      | 50.37 | 29.08 | 1552.94 | 20.14 |
| <b><i>Abraliopsis</i> sp.</b>                                | 45.1         | 0.02       | 464      | 8.85       | 117      | 40.07      | 28.25 | 16.31 | 355.26  | 4.61  |
| <b><i>Gonatus</i> spp.</b>                                   | 181.6        | 0.07       | 299      | 5.70       | 110      | 37.67      | 25.08 | 14.48 | 217.56  | 2.82  |
| <b>Market squid, <i>Doryteuthis opalescens</i></b>           | 1447.6       | 0.58       | 538      | 10.26      | 88       | 30.14      | 23.66 | 13.66 | 326.81  | 4.24  |
| <b>Pacific hake, <i>Merluccius productus</i></b>             | 36360.1      | 14.69      | 331      | 6.31       | 49       | 16.78      | 21.81 | 12.59 | 352.37  | 4.57  |
| <b>Duckbill barracudina, <i>Magnisudis atlantica</i></b>     | 4568.6       | 1.85       | 218      | 4.16       | 84       | 28.77      | 20.07 | 11.59 | 172.67  | 2.24  |
| <b>Unidentified Teleostei</b>                                | 2316.9       | 0.94       | 119      | 2.27       | 65       | 22.26      | 14.70 | 8.49  | 71.35   | 0.93  |
| <b>Chubby pearleye, <i>Rosenblattichthys volucris</i></b>    | 810.6        | 0.33       | 166      | 3.17       | 49       | 16.78      | 11.71 | 6.76  | 58.61   | 0.76  |
| <b>Jack mackerel, <i>Trachurus symmetricus</i></b>           | 6668.2       | 2.69       | 72       | 1.37       | 28       | 9.59       | 7.88  | 4.55  | 38.99   | 0.51  |
| <b><i>Nansenia</i> spp.</b>                                  | 510.9        | 0.21       | 124      | 2.36       | 32       | 10.96      | 7.81  | 4.51  | 28.17   | 0.37  |
| <b><i>Onychoteuthis borealijaponica</i></b>                  | 656.6        | 0.27       | 60       | 1.14       | 35       | 11.99      | 7.73  | 4.47  | 16.89   | 0.22  |
| <b>Slender barracudina, <i>Lestidiops ringens</i></b>        | 330.0        | 0.13       | 92       | 1.75       | 29       | 9.93       | 6.82  | 3.94  | 18.75   | 0.24  |
| <b>Pacific pomfret, <i>Brama japonica</i></b>                | 5241.6       | 2.12       | 41       | 0.78       | 24       | 8.22       | 6.42  | 3.71  | 23.83   | 0.31  |
| <b>Pacific sardine, <i>Sardinops sagax</i></b>               | 1823.1       | 0.74       | 77       | 1.47       | 26       | 8.90       | 6.41  | 3.70  | 19.63   | 0.25  |
| <b>Luvar, <i>Luvarus imperialis</i></b>                      | 19258.5      | 7.78       | 18       | 0.34       | 7        | 2.40       | 6.07  | 3.51  | 19.47   | 0.25  |
| <b>Pacific saury, <i>Cololabis saira</i></b>                 | 1366.8       | 0.55       | 76       | 1.45       | 21       | 7.19       | 5.31  | 3.06  | 14.39   | 0.19  |
| <b>Unidentified Scopelarchidae</b>                           | 476.9        | 0.19       | 86       | 1.64       | 20       | 6.85       | 5.01  | 2.89  | 12.55   | 0.16  |
| <b>Cock-eyed squid, <i>Histioteuthis heteropsis</i></b>      | 1312.2       | 0.53       | 52       | 0.99       | 18       | 6.16       | 4.44  | 2.56  | 9.38    | 0.12  |



Feeding ecology of broadbill swordfish

|                                                           |        |       |     |      |    |      |      |      |       |       |
|-----------------------------------------------------------|--------|-------|-----|------|----|------|------|------|-------|-------|
| Pacific mackerel, <i>Scomber japonicus</i>                | 2180.7 | 0.88  | 66  | 1.26 | 16 | 5.48 | 4.40 | 2.54 | 11.72 | 0.15  |
| Sunbeam lampfish, <i>Lampadena urophaos</i>               | 201.9  | 0.08  | 42  | 0.80 | 18 | 6.16 | 4.07 | 2.35 | 5.44  | 0.07  |
| King-of-the-salmon, <i>Trachipterus altivelis</i>         | 5577.4 | 2.25  | 25  | 0.48 | 13 | 4.45 | 3.86 | 2.39 | 10.59 | 0.16  |
| Flower vase jewell squid, <i>Histioteuthis dofleini</i>   | 560.1  | 0.23  | 25  | 0.48 | 15 | 5.14 | 3.37 | 1.95 | 3.61  | 0.05  |
| Unidentified Eucarida                                     | 5.5    | <0.01 | 154 | 2.94 | 6  | 2.05 | 2.88 | 1.67 | 6.04  | 0.08  |
| Unidentified Teuthoidea                                   | 202.0  | 0.08  | 15  | 0.29 | 12 | 4.11 | 2.58 | 1.49 | 1.51  | 0.02  |
| Spotted barracudina, <i>Arctozenus risso</i>              | 67.9   | 0.03  | 14  | 0.27 | 8  | 2.74 | 1.75 | 1.01 | 0.81  | 0.01  |
| <i>Histioteuthis</i> spp.                                 | 56.7   | 0.02  | 9   | 0.17 | 8  | 2.74 | 1.69 | 0.98 | 0.53  | 0.01  |
| <i>Argonauta</i> sp.                                      | 13.1   | 0.01  | 8   | 0.15 | 8  | 2.74 | 1.67 | 0.97 | 0.43  | 0.01  |
| Striped mullet, <i>Mugil cephalus</i>                     | 1737.8 | 0.70  | 8   | 0.15 | 4  | 1.37 | 1.28 | 0.74 | 1.17  | 0.02  |
| <i>Octopoteuthis</i> sp.                                  | 2.1    | <0.01 | 6   | 0.11 | 6  | 2.05 | 1.25 | 0.72 | 0.24  | <0.01 |
| Bigfin lampfish, <i>Symbolophorus californiensis</i>      | 5.4    | <0.01 | 7   | 0.13 | 5  | 1.71 | 1.07 | 0.62 | 0.23  | <0.01 |
| Sharpchin barracudina, <i>Stemonosudis macrura</i>        | 8.8    | <0.01 | 8   | 0.15 | 4  | 1.37 | 0.88 | 0.51 | 0.21  | <0.01 |
| <i>Cranchia scabra</i>                                    | 4.5    | <0.01 | 5   | 0.10 | 4  | 1.37 | 0.85 | 0.49 | 0.13  | <0.01 |
| Mexican lampfish, <i>Triphoturus mexicanus</i>            | <0.1   | <0.01 | 4   | 0.08 | 4  | 1.37 | 0.83 | 0.49 | 0.10  | <0.01 |
| Paralepididae, Barracudinas                               | 111.3  | 0.04  | 7   | 0.13 | 3  | 2.40 | 1.49 | 0.86 | 0.43  | 0.01  |
| Unidentified Euphausiidae                                 | 3.0    | <0.01 | 6   | 0.11 | 3  | 2.05 | 1.25 | 0.72 | 0.24  | <0.01 |
| Robust clubhook squid, <i>Onykia robusta</i>              | 43.3   | 0.02  | 4   | 0.08 | 3  | 1.37 | 0.85 | 0.49 | 0.13  | <0.01 |
| Northern anchovy, <i>Engraulis mordax</i>                 | 1.6    | <0.01 | 4   | 0.08 | 3  | 1.37 | 0.84 | 0.49 | 0.11  | <0.01 |
| California smoothtongue, <i>Leuroglossus stilbius</i>     | <0.1   | <0.01 | 4   | 0.08 | 3  | 1.37 | 0.83 | 0.49 | 0.10  | <0.01 |
| Unidentified Tunicata                                     | 3.5    | <0.01 | 3   | 0.06 | 3  | 1.03 | 0.63 | 0.37 | 0.06  | <0.01 |
| Smalleye squaretail, <i>Tetragonurus cuvieri</i>          | 161.9  | 0.07  | 3   | 0.06 | 2  | 1.03 | 0.66 | 0.39 | 0.13  | <0.01 |
| <i>Onychoteuthis</i> sp.                                  | <0.1   | <0.01 | 4   | 0.08 | 2  | 1.37 | 0.83 | 0.49 | 0.10  | <0.01 |
| <i>Japetella</i> sp.                                      | <0.1   | <0.01 | 4   | 0.08 | 2  | 1.37 | 0.83 | 0.49 | 0.10  | <0.01 |
| Splitnose rockfish, <i>Sebastes diploproa</i>             | 924.2  | 0.37  | 2   | 0.04 | 1  | 0.68 | 0.63 | 0.36 | 0.28  | <0.01 |
| Northern lampfish, <i>Stenobranchius leucopsarus</i>      | <0.1   | <0.01 | 2   | 0.04 | 2  | 0.68 | 0.42 | 0.24 | 0.03  | <0.01 |
| <i>Octopus rubescens</i>                                  | <0.1   | <0.01 | 2   | 0.04 | 2  | 0.68 | 0.42 | 0.24 | 0.03  | <0.01 |
| <i>Chiroteuthis calyx</i>                                 | <0.1   | <0.01 | 2   | 0.04 | 2  | 0.68 | 0.42 | 0.24 | 0.03  | <0.01 |
| Albacore, <i>Thunnus alalunga</i>                         | 371.6  | 0.15  | 1   | 0.02 | 1  | 0.34 | 0.30 | 0.17 | 0.06  | <0.01 |
| <i>Sebastes</i> spp.                                      | 3.0    | <0.01 | 8   | 0.15 | 1  | 2.74 | 1.67 | 0.97 | 0.42  | 0.01  |
| Halfmoon, <i>Medialuna californiensis</i>                 | 81.0   | 0.03  | 1   | 0.02 | 1  | 0.34 | 0.23 | 0.13 | 0.02  | <0.01 |
| Dogtooth lampfish, <i>Ceratoscopelus townsendi</i>        | 1.5    | <0.01 | 2   | 0.04 | 1  | 0.68 | 0.42 | 0.24 | 0.03  | <0.01 |
| Shortbelly rockfish, <i>Sebastes jordani</i>              | 0.4    | <0.01 | 2   | 0.04 | 1  | 0.68 | 0.42 | 0.24 | 0.03  | <0.01 |
| <i>Leachia dislocata</i>                                  | <0.1   | <0.01 | 2   | 0.04 | 1  | 0.68 | 0.42 | 0.24 | 0.03  | <0.01 |
| Pacific bonito, <i>Sarda chiliensis</i>                   | 25.8   | 0.01  | 1   | 0.02 | 1  | 0.34 | 0.21 | 0.12 | 0.01  | <0.01 |
| <i>Auxis</i> sp.                                          | 4.7    | <0.01 | 1   | 0.02 | 1  | 0.34 | 0.21 | 0.12 | 0.01  | <0.01 |
| <i>Mastigoteuthis dentata</i>                             | <0.1   | <0.01 | 1   | 0.02 | 1  | 0.34 | 0.21 | 0.12 | 0.01  | <0.01 |
| <i>Octopus</i> spp.                                       | <0.1   | <0.01 | 1   | 0.02 | 1  | 0.34 | 0.21 | 0.12 | 0.01  | <0.01 |
| California flashlightfish, <i>Protomyctophum crockeri</i> | <0.1   | <0.01 | 1   | 0.02 | 1  | 0.34 | 0.21 | 0.12 | 0.01  | <0.01 |

Feeding ecology of broadbill swordfish

|                                                   |      |       |   |      |   |      |      |      |      |       |
|---------------------------------------------------|------|-------|---|------|---|------|------|------|------|-------|
| California headlightfish,<br><i>Diaphus theta</i> | <0.1 | <0.01 | 1 | 0.02 | 1 | 0.34 | 0.21 | 0.12 | 0.01 | <0.01 |
| Unidentified Isopoda                              | <0.1 | <0.01 | 1 | 0.02 | 1 | 0.34 | 0.21 | 0.12 | 0.01 | <0.01 |

324

325

326 In general, both large and small swordfish fed on similar prey but some differences were  
 327 apparent. Based on GII results, jumbo squid was the most important prey item followed by the *G.*  
 328 *borealis*, and *Abraliopsis* sp., in both size classes. However, northern anchovy was found only in  
 329 stomachs of the small size group while luvar was eaten only by large swordfish (Table S1 and S2).  
 330 Jumbo squid, *Gonatus* spp., and Pacific hake were significantly more important in larger swordfish  
 331 than smaller swordfish (Table S3).

332 A comparison of the GII results by area indicated that jumbo squid and *G. borealis* were the  
 333 two most important prey of swordfish in both areas. The third ranked species were *Abraliopsis* sp.  
 334 within the SCB, and Pacific hake beyond the SCB. Striped mullet (*Mugil cephalus*), northern anchovy  
 335 and *Sebastes* spp. were recorded only within the SCB (Table S4 and S5). Jumbo squid, *Gonatus* spp.  
 336 and market squid were significantly more important within the SCB than beyond the SCB, while *G.*  
 337 *borealis* and Pacific hake were significantly more important beyond the SCB (Table S6).

338 Between-year comparisons showed that jumbo squid was the first ranked prey, followed by *G.*  
 339 *borealis*, in 2007, 2008, 2010, 2012 and 2013. The importance of jumbo squid, *G. borealis*, *Gonatus*  
 340 spp., market squid and Pacific hake in the diet all varied significantly between years over the study  
 341 period (Table S15). In 2009, *G. borealis* was the most important prey followed by jumbo squid. In  
 342 2011 and 2014, Pacific hake ranked first followed by *G. borealis*. Pacific hake was not present in the  
 343 samples from 2008 through 2010. *Abraliopsis* sp. was important overall (ranked third) but was not  
 344 present in 2012. *Gonatus* spp. ranked fourth overall but was not present in the diet in 2011 (Table S7-  
 345 S14).

## 346 **Redundancy Analysis (RDA)**

347 Explanatory variables related to fish length (EFL), area, year and half-year, all significantly  
348 affected the overall pattern of variation in diet (numerical importance of prey) in swordfish (Table 3).  
349 Diet was significantly different (versus other years) in 2007 and 2011-2014. The set of explanatory  
350 variables used explained 6 % of the overall variation in prey counts, with RDA axes 1 and 2  
351 accounting for 36.9 % and 23.1 % of this variation respectively. The first two RDA axes thus explain  
352 around 3.8 % of variation in prey counts, i.e., although significant temporal, spatial and size-related  
353 variation in diet has been demonstrated, the majority of observed dietary variation remains  
354 unexplained.

355  
356 **Table 3.** Results of redundancy analysis (RDA) of variation in diet composition of swordfish (based  
357 on prey numbers). Values of  $F$  and associated probability ( $p$ -value) are tabulated for two sets of model  
358 runs. The variable ‘year’ (fishing season) was divided into three categories (2007, 2008-2010 and  
359 2011-2014) and converted into three (0,1) dummy variables. Since the category may be identified  
360 once the values of two of the dummy variables have been defined, all three dummy variables cannot  
361 be included in the same run of the model. Left: model runs excluding 2011-2014. Right: model runs  
362 excluding 2007. (EFL = eye to fork length, Area = east and west of 120°30’W, Half-year = August  
363 15<sup>th</sup> through November 7<sup>th</sup> and November 8<sup>th</sup> through January 31<sup>st</sup>).

| Variable  | $F$ -statistics | $p$ -value   | $F$ -statistics | $p$ -value   |
|-----------|-----------------|--------------|-----------------|--------------|
| EFL       | 4.117           | <b>0.005</b> | 4.254           | <b>0.005</b> |
| Area      | 3.896           | <b>0.005</b> | 3.895           | <b>0.005</b> |
| 2007      | 3.383           | <b>0.005</b> |                 |              |
| Half-year | 2.025           | <b>0.005</b> | 2.123           | <b>0.005</b> |
| 2011-2014 |                 |              | 5.016           | <b>0.005</b> |
| 2008-2010 | 3.568           | <b>0.005</b> | 1.042           | 0.415        |
| SST       | 0.758           | 0.785        | 0.758           | 0.815        |

364

## 365 Generalized Additive Models (GAMs)

366 To investigate sources of variation in the importance of individual prey taxa, binomial GAMs  
 367 were fitted for presence/absence of each the seven most important prey taxa, as ranked by GII. For  
 368 jumbo squid, the final model contained significant effects of SST, EFL and year (Table 4). The  
 369 presence of jumbo squid in swordfish stomachs was highest with SST around 21.5°C, it showed a  
 370 linear increase with increasing swordfish length, and it was lowest in 2009 and highest in 2007 (Fig  
 371 4a). The final model for *G. borealis* contained effects of year and area (Table 4). The presence of *G.*  
 372 *borealis* in swordfish stomachs was highest in 2009 and lowest around 2012 (Fig 4b), and was higher  
 373 beyond the SCB area than within.

374  
 375 **Table 4.** Effect of explanatory variables on the presence of the main prey taxa in swordfish diet (form  
 376 and direction of the relationship and statistical significance). The first row for each species-variable  
 377 combination contains the estimated degrees of freedom (edf) in the case of smoothers. The second  
 378 row indicates the probability. Only significant effects, retained in the final models, are shown.  
 379 Swordfish body length was measured as eye-to-fork length (EFL, cm). DE = deviance explained, AIC  
 380 = value of the Akaike Information Criterion. Blank cells indicate non-significant effects that were  
 381 dropped during model selection. 1<sup>st</sup> = first half of year, 2<sup>nd</sup> = second half of year; IN=within the SCB,  
 382 OFF = beyond the SCB subregion.

383

| Swordfish                  | EFL                 | Year                | SST                 | Half-year                                    | Area               | DE   | AIC    |
|----------------------------|---------------------|---------------------|---------------------|----------------------------------------------|--------------------|------|--------|
| Jumbo squid                | 1.0 (+)<br>P<0.0001 | 2.9 (U)<br>P<0.0001 | 2.5 (+)<br>P<0.0001 |                                              |                    | 25.0 | 1073.6 |
| <i>Gonatopsis borealis</i> |                     | 2.9 (∩)<br>P<0.0001 |                     |                                              | OFF>IN<br>P=0.0105 | 14.5 | 963.97 |
| <i>Abraliopsis</i> sp.     | 1.0 (+)<br>P=0.0468 | 2.9 (∩)<br>P=0.0031 |                     |                                              |                    | 9.8  | 727.51 |
| <i>Gonatus</i> spp.        |                     | 2.8 (U)<br>P=0.0058 |                     | 1 <sup>st</sup> >2 <sup>nd</sup><br>P=0.0049 |                    | 13.4 | 632.83 |

|                      |          |          |                                  |          |      |        |
|----------------------|----------|----------|----------------------------------|----------|------|--------|
| Market squid         |          | 2.8 (∩)  |                                  | IN>OFF   | 21.6 | 683.98 |
|                      |          | P<0.0001 |                                  | P=0.0050 |      |        |
| Pacific hake         | 2.7 (+)  | 2.0 (+)  |                                  |          | 26.6 | 355.48 |
|                      | P=0.0183 | P=0.0004 |                                  |          |      |        |
| Duckbill barracudina |          | 2.9 (∩)  | 2 <sup>nd</sup> >1 <sup>st</sup> | OFF>IN   | 20.7 | 496.50 |
|                      |          | P=0.0002 | P=0.0097                         | P=0.0053 |      |        |

384

385 For *Abraliopsis* sp., the final model contained effects of year and length (Fig 4c). The presence  
 386 of *Abraliopsis* sp. in swordfish stomachs was lowest in 2014 and highest in 2012, and showed a linear  
 387 increase with increasing swordfish length (Fig 4c). For *Gonatus* spp. the final model contained effects  
 388 of year and half-year (Table 4). The presence of *Gonatus* spp. in swordfish stomachs was highest  
 389 around 2008-2009 and 2014 and was lowest in 2012 (Fig 4d). Numbers of *Gonatus* spp. were higher  
 390 in the first half-year (August 15 through November 7) than in the second (Table 4).

391 For market squid, the final model contained effects of year and area (Table 4). The presence of  
 392 market squid in swordfish stomachs was highest in 2010 (Fig 4e) and was higher within the SCB area  
 393 than beyond it. For Pacific hake, the final model contained effects of year and length (Table 4). The  
 394 presence of Pacific hake in swordfish stomachs was highest in 2012 and showed a positive  
 395 relationship with fish length at lengths between around 125 and 150 cm (Fig 4f). For duckbill  
 396 barracudina, the final model contained effects of year, area, and half-year (Table 4). The presence of  
 397 duckbill barracudina in swordfish stomachs was highest in 2009 (Fig 4g). It was greater beyond the  
 398 SCB area and during the second half of the fishing season (November 8 through January 31).

399

400 **Fig 4.** GAM smoothing curves fitted to partial effects of explanatory variables on the presence of 7  
 401 prey taxa in the stomach of swordfish. EFL = eye-to-fork length. Dashed lines represent 95%  
 402 confidence intervals around the main effects.

403

## 404 **Discussion**

405           Swordfish display several notable adaptations that might be expected to influence their  
406 selection of prey items among the range of species present in the CCLME. Swordfish have cranial  
407 endothermy [27], with brain temperature elevated by up to 10°C-15°C above the temperature of the  
408 surrounding water when swimming [25], resulting in superior vision. Warming the brain and eyes  
409 may allow swordfish to remain active and responsive, increasing their visual threshold throughout the  
410 wide range of temperatures encountered in their vertical and migratory movements, permitting  
411 exploitation of different environments and prey [25]. The use of the “sword” for immobilizing or  
412 killing prey has been reported in past studies [29, 41, 46, 50] and a number of prey items in this study  
413 showed signs of being slashed, punctured or cut. The “sword” has a similar hunting function as the  
414 thresher’s tail [110] and can be used to stun fish [111]. Adult swordfish are toothless [112] and  
415 swallow their prey whole. Interactions between whales and billfish have been occasionally observed  
416 [113] and records of fractured swords embedded in whales can be found in the literature [114-118]  
417 but there is no evidence of billfish feeding attacks on whales.

418           Vertical movements allow pelagic predators to extend their prey base or access different  
419 resources. In marine ecosystems, diel changes in distribution or behavior of predators are frequently  
420 in tune with diel changes in prey distribution, such as vertical migration of organisms associated with  
421 the deep scattering layer (DSL) [119]. The diurnal vertical distribution of swordfish is region-specific  
422 and likely influenced by both abiotic (temperature, thermocline depth, dissolved oxygen) and biotic  
423 factors (prey abundance and distribution, body temperature) [21]. Swordfish can feed at great depths  
424 during diurnal vertical migrations [26] and can feed during both day and night within the DSL [120].  
425 Electronic tagging studies on swordfish in the CCLME show that these predators are capable of

426 exhibiting highly variable movements during the day but are consistently found within the upper  
427 mixed layer at night [21, 23]. These movements are consistent with those of the DSL.

428 Results of the present study indicate that swordfish fed mainly on cephalopods and teleosts,  
429 the most important prey taxa being jumbo squid (*Dosidicus gigas*), *Gonatopsis borealis* and  
430 *Abraliopsis* sp., while teleosts included both epipelagic and mesopelagic species. Results are thus in  
431 broad agreement with those from several studies of this species in other regions [34, 50, 55, 62, 63,  
432 75, 77], although the relative importance of fish and cephalopods varies between different areas (see  
433 Table 1).

434 Jumbo squid was an important prey item for swordfish in the CCLME, as was also the case for  
435 several shark species (for mako, blue and bigeye thresher) in the area [5]. This finding is likely linked  
436 to the range expansion of jumbo squid that started around 2002 in the CCLME. These cephalopods,  
437 rarely found in the CCLME previously, greatly extended their range in the eastern North Pacific  
438 Ocean during a period characterized by ocean-scale warming, regional cooling, and the decline of  
439 tuna and billfish populations throughout the Pacific [121, 122]. Jumbo squid belong to the  
440 Ommastrephidae, a family of largely pelagic squids that includes several species that support  
441 important commercial squid fisheries around the world [123]. Ommastrephids, in general, have been  
442 described as the most important cephalopod prey for swordfish in other regions of the world [29, 46,  
443 47, 49, 50, 52, 54, 56, 58, 62, 64, 75] in both coastal and pelagic ecosystems.

444 Of the squids eaten by swordfish, while ommastrephids, gonatids and onychoteuthids, are  
445 mainly epipelagic and all are powerful swimmers, the histioteuthids are predominantly mesopelagic  
446 drifters [63], indicating that swordfish can feed in different environments. Since swordfish detect their  
447 prey visually [26], swordfish may more easily catch fast-swimming, medium to large cephalopods  
448 than small, slow-moving prey [63].

449 Pacific hake was, overall, the most important teleost species in the diet, based on ranking by  
450 GII, followed by duckbill barracudina. Scombrids were also present in the diet. Merlucciids,  
451 paralepidids, and scombrids have been described as important fish prey species of swordfish in a  
452 number of other studies in different areas [29, 46, 47, 50, 52, 56, 61, 62]. All are abundant species in  
453 coastal pelagic ecosystems where swordfish are usually caught. Seven species of Myctophidae, two  
454 species of Scopelarchidae and one species of Bathylagidae were present in this study, indicating that  
455 swordfish forage frequently in mesopelagic waters.

456 A number of the most important swordfish prey species are found in or associated with the  
457 DSL, including jumbo squid, *G. borealis* and *Gonatus* spp. squids, barracudinas, and Pacific hake  
458 [124-130]. Other important prey, like *Abraliopsis* sp. and market squid, are more epipelagic. The  
459 range of prey species eaten, in terms of both prey size and prey habitat, suggests that swordfish have  
460 quite flexible foraging strategies.

461

## 462 **Dietary variation in swordfish**

463 The importance of several prey taxa varied in relation to swordfish body size, location, year  
464 and, in some cases, differed between the first and second half of the fishing season. Jumbo squid,  
465 *Gonatus* spp. and Pacific hake were all more important as prey for larger swordfish than for smaller  
466 ones. At least in part, this may reflect the ability of larger swordfish to catch and eat large prey. These  
467 results differ from those of [62] who did not find variability in diet by size in swordfish off western  
468 Baja California.

469 Jumbo squid, *Gonatus* spp. and market squid were more important inshore (within the SCB)  
470 while *G. borealis* and Pacific hake were more important offshore (beyond the SCB). These



471 differences probably reflect prey availability but more information is needed on distribution of  
472 cephalopods and fish to confirm this.

473         Significant between-year variation in diet was also apparent. In general, this may reflect long-  
474 term variation in swordfish preference, prey availability, prey distribution, and prey abundance, but  
475 could also be related to changes in fishing locations. According to GII results, jumbo squid was more  
476 important in swordfish diet from 2007-2010 than in 2011-2014, with Pacific hake being the most  
477 important prey item in the latter period. However, GAM analysis shows a peak in jumbo squid for  
478 2012, suggesting this species increased in dietary importance after 2010, once other factors are taken  
479 into account. These results likely relate to the range expansion of jumbo squid that occurred during  
480 the first decade of the 2000s and the subsequent decline to lower levels in 2010 in the CCLME [131].  
481 A prolonged decline of jumbo squid landings was observed also in the Gulf of California after El  
482 Niño (2009-2010) and was associated with chronic low-wind stress and decreased chlorophyll a  
483 [132].

484         *G. borealis*, *Gonatus* spp. and market squid were most important from 2008-2010, a period  
485 which included both (cold) La Niña conditions in 2008 and a (warm) El Niño event in 2010. The  
486 increased incidence of market squid in swordfish diet coincided with a high abundance of market  
487 squid in both midwater trawl surveys and in landings [133]. The commercial squid fishery in  
488 California targets spawning aggregations 1–3 km from the shore, around the Channel Islands and near  
489 coastal canyons. Catches are highly influenced by El Niño events [134, 135]. The cooler water during  
490 the La Niña years may have favored higher abundance and therefore higher catches in market squid  
491 [136].

492         Northern anchovy is a monitored species under the Pacific Fishery Management Council's  
493 Coastal Pelagic Species fishery management plan. It was only found in three stomachs in this study,

494 inside the SCB in 2007 and 2008. [61] examined the stomach contents of 15 swordfish caught near  
495 the Southern California Channel Island in fall/winter of 1980 and found that northern anchovy  
496 accounted for over 40% of IRI. These differences may be attributed to variations in anchovy  
497 abundance over the years. Anchovy were present in higher numbers in the California Current prior to  
498 1990 with a peak in catches around 1980 [137]. Catch estimates show that, starting around 2009 to  
499 2013, northern anchovy biomass dropped to low levels [138]. Analysis of northern anchovy stock size  
500 from 1951–2011 suggested that the population was near an all-time low from 2009–2011 [139], and  
501 subsequent analysis suggested that the population remained low through 2015 [140]. More recent  
502 minimum abundance estimates based on acoustic trawl surveys indicate the combined biomass of the  
503 Northern and Central stocks rebounded to a range from 0.5 to 1.1 million metric tons in 2018 and  
504 2019 [141, 142].

505 Pacific sardine (the abundance of which until recently was believed to vary inversely with that  
506 of anchovy) [143-145] was not present in the diet in 2007 and sardine %F was low for other years of  
507 the study. These results are possibly related to the low sardine biomass during the study period [146],  
508 but they could be explained also by limited swordfish preference for sardine. [62] reported a low %F  
509 for sardine in the diet of swordfish from northern Baja California in 1992-1993, a period when sardine  
510 biomass was higher in the area.

511 Future diet studies on swordfish in the CCLME would benefit from more information on prey  
512 distribution and abundance (and thus their availability to swordfish) and on the size distribution of  
513 available and consumed prey. This would potentially allow elucidation of (multivariate) functional  
514 responses (i.e., how numbers of a prey species in the diet relate to its abundance and the abundance of  
515 other prey species) [147]. The present study would have benefited from a larger sample size since the  
516 rarefaction curve (for number of prey species detected versus sample size) did not reach an asymptote.

517 Samples used in this study were collected during the fall/winter period and were fisheries-dependent  
518 so information on the diet at other times of the year is lacking. Results are also potentially influenced  
519 by the distribution and targeting of fisheries effort and catch. While additional studies are warranted,  
520 this study provides the most comprehensive view of swordfish diets in the CCLME to date, allowing  
521 for comparisons of diet in relation to size, year and area.

522

## 523 **Supporting information**

524 **Table S1.** Quantitative prey composition of the broadbill swordfish (EFL < 165 cm) in the California  
525 Current. A total of 148 stomachs containing food was examined. Prey items are shown by decreasing  
526 GII value. See methods for description of the measured values.

527 **Table S2.** Quantitative prey composition of the broadbill swordfish (EFL  $\geq$  165 cm) in the California  
528 Current. A total of 140 stomachs containing food was examined. Prey items are shown by decreasing  
529 GII value. See methods for description of the measured values.

530 **Table S3.** Comparison of GII for the main prey species between small and medium broadbill  
531 swordfish. Values of mean GII, bootstrapped 95% CIs and % bootstrap runs in which each prey type  
532 was in the smaller of two size categories of swordfish. If more than 95% (or fewer than 5%) of runs  
533 show the prey type was more important in the smaller size category of swordfish than in the larger  
534 category, we consider the difference to be significant. S = small (EFL < 165 cm), M = medium (EFL  
535  $\geq$  165 cm). These results are generally consistent with inferences from non-overlap of 95% CIs.

536 **Table S4.** Quantitative prey composition of the broadbill swordfish within the SCB subregion. A total  
537 of 199 stomachs containing food was examined. Prey items are shown by decreasing GII value. See  
538 methods for description of the measured values.

539 **Table S5.** Quantitative prey composition of the broadbill swordfish beyond the SCB subregion. A  
540 total of 93 stomachs containing food was examined. Prey items are shown by decreasing GII value.  
541 See methods for description of the measured values.

542 **Table S6.** Comparison of GII for the main prey species between broadbill swordfish within and  
543 beyond the SCB region. Values of mean GII, bootstrapped 95% CIs and % bootstrap runs in which  
544 each prey type was in each of two categories of swordfish. If more than 95% (or fewer than 5%) of  
545 runs show the prey type was more important in one region than the other, we consider the difference  
546 to be significant. East = within the SCB subregion, West = beyond the SCB subregion. These results  
547 are generally consistent with inferences from non-overlap of 95% CIs.

548 **Table S7.** Quantitative prey composition of the broadbill swordfish during year 2007 in the California  
549 Current. A total of 47 stomachs containing food was examined. Prey items are shown by decreasing  
550 GII value. See methods for description of the measured values.

551 **Table S8.** Quantitative prey composition of the broadbill swordfish during year 2008 in the California  
552 Current. A total of 16 stomachs containing food was examined. Prey items are shown by decreasing  
553 GII value. See methods for description of the measured values.

554 **Table S9.** Quantitative prey composition of the broadbill swordfish during year 2009 in the California  
555 Current. A total of 37 stomachs containing food was examined. Prey items are shown by decreasing  
556 GII value. See methods for description of the measured values.

557 **Table S10.** Quantitative prey composition of the broadbill swordfish during year 2010 in the  
558 California Current. A total of 12 stomachs containing food was examined. Prey items are shown by  
559 decreasing GII value. See methods for description of the measured values.

560 **Table S11.** Quantitative prey composition of the broadbill swordfish during year 2011 in the  
561 California Current. A total of 54 stomachs containing food was examined. Prey items are shown by  
562 decreasing GII value. See methods for description of the measured values.

563 **Table S12.** Quantitative prey composition of the broadbill swordfish during year 2012 in the  
564 California Current. A total of 36 stomachs containing food was examined. Prey items are shown by  
565 decreasing GII value. See methods for description of the measured values.

566 **Table S13.** Quantitative prey composition of the broadbill swordfish during year 2013 in the  
567 California Current. A total of 56 stomachs containing food was examined. Prey items are shown by  
568 decreasing GII value. See methods for description of the measured values.

569 **Table S14.** Quantitative prey composition of the broadbill swordfish during year 2014 in the  
570 California Current. A total of 34 stomachs containing food was examined. Prey items are shown by  
571 decreasing GII value. See methods for description of the measured values.

572 **Table S15.** Comparison of GII for the main prey species for broadbill swordfish by year group.  
573 Values of mean GII, bootstrapped 95% CIs and % bootstrap runs in which each prey type was in each  
574 of two categories of swordfish. If more than 95% (or fewer than 5%) of runs show the prey type was  
575 more important in one year than the other, we consider the difference to be significant. Y1 = Year1  
576 (2007), Y2 = Year2 (2008-2010), Y3 = Year3 (2011-2014). These results are generally consistent  
577 with inferences from non-overlap of 95% CIs.

578

579

## 580 **Acknowledgements**

581           This work would not have been possible without the assistance and samples provided by the  
582 NMFS Southwest Region Fishery Observer Program and the participating drift gillnet fishermen. We  
583 thank several assistant volunteers who helped process the stomach samples. Mark Lowry, Eric  
584 Hochberg and John Hyde helped identify some prey specimen. John Field, Chugey Sepulveda and  
585 Scott Aalbers offered science feedback. Kristen Koch, Annie Yau, Brad Erisman, Heidi Dewar,  
586 Stephanie Flores, Crystal Dombrow, Elan Portner and Ruben Bergtraun provided useful comments on  
587 the draft. Debra Losey helped with library research. We also thank several anonymous reviewers for  
588 their careful critiques that helped improve the manuscript.

589

## 590 **Author Contributions**

591 **Conceptualization:** Antonella Preti, Graham J. Pierce

592 **Data curation:** Antonella Preti, Stephen M. Stohs, Graham J. Pierce

593 **Formal analysis:** Antonella Preti, Stephen M. Stohs, Graham J. Pierce, Camilo Saavedra

594 **Funding acquisition:** Gerard T. DiNardo

595 **Investigation:** Antonella Preti

596 **Methodology:** Antonella Preti, Graham J. Pierce, Stephen M. Stohs, Camilo Saavedra

597 **Project administration:** Antonella Preti

598 **Software:** Stephen M. Stohs, Antonella Preti, Graham J. Pierce, Camilo Saavedra

599 **Supervision:** Graham J. Pierce, Stephen M. Stohs, Ken MacKenzie, Leslie R. Noble, Catherine S.

600 Jones

601 **Validation:** Antonella Preti

602 **Visualization:** Antonella Preti

603 **Writing – original draft:** Antonella Preti

604 **Writing – review & editing:** Antonella Preti, Graham J. Pierce, Stephen M. Stohs, Gerard T.

605 DiNardo, Camilo Saavedra, Ken MacKenzie, Leslie R. Noble, Catherine S. Jones.

606

## 607 **References**

- 608 1. Palko BJ, Beardsley GL, Richards WJ. Synopsis of the biology of the swordfish, *Xiphias*  
609 *gladius* Linnaeus. NOAA Technical Report NMFS Circular 441/FAO Fisheries Synopsis.  
610 1981; 127.
- 611 2. Bedford DW, Hagerman FB. Billfish fishery resource of the California current. CalCOFI Rep.  
612 1983; 24:70–78.
- 613 3. Hinton MG. Status of swordfish stocks in the eastern Pacific Ocean estimated using data from  
614 Japanese tuna longline fisheries. J Mar Freshw Res. 2003; 54:393-399.
- 615 4. PFMC (Pacific Fishery Management Council). Fishery management plan and environmental  
616 impact statement for US West Coast fisheries for highly migratory species. 2003; NOAA  
617 award No NA03NMF4410067.
- 618 5. Preti A. Trophic ecology of nine top predators in the California Current. PhD dissertation,  
619 University of Aberdeen, Scotland, UK. 2020.
- 620 6. Watters GM, Olson RJ, Francis RC, Fiedler PC, Polovina JJ, Reilly SB, et al. Physical forcing  
621 and the dynamics of the pelagic ecosystem in the eastern tropical Pacific: simulations with  
622 ENSO-scale and global-warming climate drivers. Can J Fish Aquat Sci. 2003; 60:1161-1175.
- 623 7. Sepulveda CA, Aalbers SA, Heberer C. Testing modified deep-set buoy gear to minimize  
624 bycatch and increase swordfish selectivity. BREP. 2014a; 1:27-32.

- 625 8. Sepulveda CA, Heberer C, Aalbers SA. Development and trial of deep-set buoy gear for  
626 swordfish, *Xiphias gladius*, in the Southern California Bight. Mar Fish Rev. 2014b; 76 p 28-  
627 36.
- 628 9. PFMC. Agenda Item I.4 Situation Summary: Deep-Set Buoy Gear Authorization –Final  
629 Action. 251st Session of the Pacific Fishery Management Council, San Diego, CA. URL.  
630 2019; September 11-18.
- 631 10. Ichinokawa M, Brodziak J. Stock boundary between possible swordfish stocks in the  
632 northwest and southeast Pacific judged from fisheries data of Japanese  
633 longliners. ISC/08/Special Session on Billfish Stock Structure. 2008; 4 p14.
- 634 11. Tagami D, Wang H, Chang Y. Spatial distribution of swordfish catches for longline fisheries  
635 in the Western and Central North Pacific and Eastern Ocean. Working document submitted to  
636 the ISC Billfish Working Group Workshop. 2014.
- 637 12. Hinton MG, Maunder MN. Status of swordfish in the Eastern Pacific Ocean in 2010 and  
638 outlook for the future. IATTC Rep. 2011; pp 1-33.
- 639 13. International Scientific Committee (ISC). North Pacific swordfish (*Xiphias gladius*) stock  
640 assessment in 2014. Report of the billfish working group. International Scientific Committee  
641 for Tuna and Tuna-like Species in the North Pacific Ocean. 2014; p 85.
- 642 14. Nakamura I. Billfishes of the world, an annotated and illustrated catalogue of marlins,  
643 sailfishes, spearfishes and swordfishes known to date. Rome: FAO Fish Synop. 1985; 5(125).
- 644 15. Ward P, Elscot S. Broadbill swordfish: status of the world fisheries. Bureau of Rural Sciences,  
645 Canberra. 2000; 208 p.
- 646 16. Ward P, Porter JM, Elscot S. Broadbill swordfish: status of established fisheries and lessons  
647 for developing fisheries. Fish Fish. 2000; 1(4) p 317-336.



- 648 17. Sakagawa GT. Trends in fisheries for swordfish in the Pacific Ocean. In: Stroud RH (eds)  
649 Planning the future of billfishes. Research and management in the 90s and beyond. Mar Recr  
650 Fish. 1989; 13:61-79.
- 651 18. Sosa-Nishizaki O, Shimizu M. Spatial and temporal CPUE trends and stock unit inferred from  
652 them for the Pacific swordfish caught by the Japanese tuna longline fishery. 1991; Bull Nat  
653 Res Inst Far Seas Fish 28:75-90.
- 654 19. Dewees CM. Swordfish. In: Leet WS, Dewees CM, Haugen CW (eds) California living  
655 marine resources and their utilization. Davis, CA: California Sea Grant Extension Program.  
656 1992; p 148-150.
- 657 20. Gorbunova NN. Breeding grounds and food of the larvae of the swordfish [*Xiphias gladius*  
658 Linné (Pisces, Xiphilidae)]. Probl Ichthyol. 1969; 1883; 9 p 375-387.
- 659 21. Sepulveda CA, Knight A, Nasby-Lucas N, Domeier ML. Fine-scale movements of the  
660 swordfish *Xiphias gladius* in the Southern California Bight. Fish Oceanogr. 2010; 19(4):279-  
661 289.
- 662 22. Dewar H, Prince ED, Musyl MK, Brill RW, Sepulveda C, Luo J, Foley D, Orbesen ES,  
663 Domeier ML, Nasby-Lucas N, Snodgrass D, Laurs RM, Hoolihan JP, Block BA, McNaughton  
664 LM. Movements and behaviors of swordfish in the Atlantic and Pacific Oceans examined  
665 using pop-up satellite archival tags. Fish Oceanogr. 2011; 20(3):219-241.
- 666 23. Sepulveda CA, Aalbers SA, Heberer C, Kohin S, Dewar H. Movements and behaviors of  
667 swordfish *Xiphias gladius* in the United States Leatherback Conservation Area Fish Oceanogr.  
668 2018; 27(4):381-394.
- 669 24. Block BA. Endothermy in fish: thermogenesis, ecology and evolution. In: Biochemistry and  
670 molecular biology of fishes. 1991; (Vol 1 pp 269-311) Elsevier.

- 671 25. Fritsches KA, Brill RW, Warrant EJ. Warm eyes provide superior vision in swordfishes. *Curr*  
672 *Biol.* 2005; 15(1) p 55-58.
- 673 26. Carey FG, Robinson BH. Daily patterns in the activities of swordfish, *Xiphias gladius*,  
674 observed by acoustic telemetry. *Fish Bull US.* 1981; 79:277-292.
- 675 27. Carey FG. A brain heater in the swordfish. *Science.* 1982; 216(4552):1327-9.
- 676 28. Carey FG. Through the thermocline and back again. Heat regulation in big fish. *Oceanus*, Fall.  
677 1992; p 79-85.
- 678 29. Tibbo SN, Day LR, Doucet WF. The swordfish (*Xiphias gladius* L.), its life-history and  
679 economic importance in the Northwest Atlantic. *Bull Fish Res Bd Canada.* 1961; 130 p 47.
- 680 30. Aguiar dos Santos R, Haimovici M. The Argentine short-finned squid *Illex argentinus* in the  
681 food webs of southern Brazil. *Sarsia.* 2000; 85(1):49-60.
- 682 31. Santos MB, Clarke MR, Pierce GJ. Assessing the importance of cephalopods in the diets of  
683 marine mammals and other top predators: problems and solutions. *Fish Res.* 2001; 52(1-2) p  
684 121-139.
- 685 32. Peristeraki P, Tserpes G, Lefkaditou E. What cephalopod remains from *Xiphias gladius*  
686 stomachs can imply about predator-prey interactions in the Mediterranean Sea? *J Fish Biol.*  
687 2005; 67(2) p 549-554.
- 688 33. Lansdell M, Young J. Pelagic cephalopods from eastern Australia: species composition,  
689 horizontal and vertical distribution determined from the diets of pelagic fishes. *Rev Fish Biol*  
690 *Fisher.* 2007; 17(2-3) p 125.
- 691 34. Logan JM, Toppin R, Smith S, Galuardi B, Porter J, Lutcavage M. Contribution of cephalopod  
692 prey to the diet of large pelagic fish predators in the central North Atlantic Ocean. *Deep Sea*  
693 *Res Part II Top Stud. Oceanogr.* 2013; 95:74-82.

- 694 35. Goode GB. Materials for a history of the swordfishes. Rep US Comm Fish (1880) 8:287-394
- 695 36. Clarke AH. Notes on the New England fishery for swordfish during the season of 1884. Rept
- 696 US Comm Fish Fish. 1886; 1884, 12:233-239.
- 697 37. Kingsley JS. The food habits of swordfish. Science. 1922; 56:225-226.
- 698 38. Parr AE. Swordfish stomach records. Ibid. 1933; 1933(4):176-179.
- 699 39. Gregory WK, Conrad GM. The comparative osteology of the swordfish (*Xiphias*) and the
- 700 sailfish (*Istiophorus*). Am Museum Novitates. 1937; 952, 25 p.
- 701 40. Rich WH. The swordfish and the swordfishery of New England. Proc Portland Soc Nat Hist.
- 702 1947; 4: 1-102.
- 703 41. Bigelow HB, Schroeder WC. Fishes of the Gulf of Maine. US Irish Wildlife Serv Fish Bull.
- 704 1953; 53, 577 p.
- 705 42. Arata GF Jr. A contribution to the life history of the swordfish, *Xiphias gladius*. Linnaeus,
- 706 from the South Atlantic coast of the United States and the Gulf of Mexico. Bull Marine Sci
- 707 Gulf Caribbean. 1977; 4(3):183-243.
- 708 43. Scott WB, Crossman EJ. The snake-eel *Omocheilus cruentifer*, in Canadian Atlantic waters.
- 709 Copeia. 1959; 1959(4):344-345.
- 710 44. Eschmeyer WN. A deepwater trawl capture of two swordfish, *Xiphias gladius*, in the Gulf of
- 711 Mexico. Copeia. 1963; 1963(3):590.
- 712 45. Manday DG. Biología pesquera del Emperador o pez de España, *Xiphias gladius* Linnaeus
- 713 (Teleostomi: Xiphiidae) en las aguas de Cuba. Poeyana Inst Biol, Acad Cien Rep Cuba, Ser B.
- 714 1964; 1:1-37.
- 715 46. Scott WB, Tibbo SN. Food and feeding habits of swordfish, *Xiphias gladius*, in the western
- 716 North Atlantic. J Fish Res Board Can. 1968; 25(5) p 903-919.

- 717 47. Scott WB, Tibbo SN. Food and feeding habits of swordfish, *Xiphias gladius* Linnaeus, in the  
718 Northwest Atlantic Ocean. In: Shomura RS and Williams R (eds) Proc Int billfish symp. Part  
719 2: Review and contributed papers. US Dep Commer NOAA Tech Rep NMFS. 1974; SSRF-  
720 675:138-141.
- 721 48. Beckett JS, Freeman HC. Mercury in swordfish and other pelagic species from the western  
722 Atlantic Ocean. In: Shomura RS, Williams F (eds) Proc of the Int Billfish Symp. Review and  
723 Contributed Papers, US Dep Comm NOAA Tech Rep NMFS. 1974; SSRF-675:154-159.
- 724 49. Toll RB, Hess SC. Cephalopods in the diet of the swordfish, *Xiphias gladius*, from the Florida  
725 Straits. Fish Bull US. 1981; 2019; 79: 765-774.
- 726 50. Stillwell CE, Kohler NE. Food and feeding ecology of the swordfish *Xiphias gladius* in the  
727 western north Atlantic Ocean with estimates of daily ration. Mar Ecol Prog Ser. 1985; 22, 239-  
728 247.
- 729 51. Azevedo M. Information on the swordfish fishery in the Portuguese Continental EEZ. ICCAT  
730 Collective Vol Scientific Papers. 1989; 32(2):282-286.
- 731 52. Moreira F. Food of the swordfish, *Xiphias gladius* Linnaeus, 1758, off the Portuguese coast. J  
732 Fish Biol. 1990; 36:623-624.
- 733 53. Clarke MR, Clarke DC, Martins HR, Silva HM. The diet of swordfish (*Xiphias gladius*) in  
734 Azorean waters. ARQUIPÉLAGO Ciências Biológicas e Marinhas Life and Marine Sciences.  
735 1995; 13:53-69.
- 736 54. Guerra A, Simón F, González AF. Cephalopods in the diet of the swordfish, *Xiphias gladius*,  
737 from the northeastern Atlantic Ocean. In: Okutani et al. (eds) The recent advances in fisheries  
738 biology. Tokai Univ Press, Tokyo, Japan. 1993; p 159-164.

- 739 55. Chancollon O, Pusineri C, Ridoux V. Food and feeding ecology of Northeast Atlantic  
740 swordfish (*Xiphias gladius*) off the Bay of Biscay. ICES J Mar Sci. 2006; 63(6) p 1075-1085.
- 741 56. Hernández-García V. The diet of the swordfish *Xiphias gladius* Linnaeus, 1758, in the central  
742 east Atlantic, with emphasis on the role of cephalopods. Fish Bull US. 1995; 93:403-411.
- 743 57. Velasco F, Quintans M. Feeding habits in pelagic longline fisheries: a new methodological  
744 approach applied to swordfish (*Xiphias gladius*) in central eastern Atlantic. ICCAT Coll Vol  
745 Sci Pap. 2000; 51 p 1705-1717.
- 746 58. Maksimov VP. Pitanie bol'sheglazogo tuntsa (*Thunnus obesus* Lowe) i mmech-ryby (*Xiphias*  
747 *gladius* L.) vostochnoi chasti tropichesko i Atlantiki. Trudy Atlanticheskogo  
748 nauchnoissledovatel'skogo instituta rybnogo khozyaistva I okeanografii (Trudy AtlantNIRO)  
749 XXV:87-99. English Transl: Bull Fish Res B Can Transl Series. 1969; 2248.
- 750 59. Cherel Y, Sabatie R, Potier M, Marsac F, Ménard F. New information from fish diets on the  
751 importance of glassy flying squid (*Hyaloteuthis pelagica*)(Teuthoidea: Ommastrephidae) in  
752 the epipelagic cephalopod community of the tropical Atlantic Ocean. Fish Bull. 2007; 105(1) p  
753 147-152.
- 754 60. Potier M, Marsac F, Cherel Y, Lucas V, Sabatié R, Maury O, et al. Forage fauna in the diet of  
755 three large pelagic fishes (lancetfish, swordfish and yellowfin tuna) in the western equatorial  
756 Indian Ocean. Fish Res. 2007; 83(1) p 60-72.
- 757 61. Mearns AJ, Young DR, Olson RJ, Schafer HA. Trophic structure and the cesium-potassium  
758 ratio in pelagic ecosystems. CalCOFI Rep. 1981; 22 p 99-110.
- 759 62. Markaida U, Sosa-Nishizaki O. Food and feeding habits of swordfish, *Xiphias gladius* L, off  
760 western Baja California. Biology and fisheries of Swordfish, *Xiphias gladius*. NOAA Tech.  
761 Rep. 1998; 142 p 245-259.

- 762 63. Markaida U, Hochberg FG. Cephalopods in the diet of swordfish (*Xiphias gladius*) caught off  
763 the west coast of Baja California, Mexico. Pac Sci. 2005; 59(1):25-41.
- 764 64. Seki MP. Trophic relationships of *Ommastrephes bartramii* during winter migrations to  
765 subtropical waters north of the Hawaiian islands. In: Okutani T, O'Dor RK, Kubodera T (eds)  
766 Recent advances in cephalopod fisheries biology. 1993; p 15-24, Tokai Univ Press, Tokyo.
- 767 65. LaMonte ER, Marcy DE. Swordfish, sailfish, marlin, and spearfish. Ichthyol Contrib Int Game  
768 Fish Assoc. 1941; 1(2):1-24.
- 769 66. de Sylva DP. Red water blooms off northern Chile, April-May 1956, with reference to the  
770 ecology of the swordfish and the striped marlin. Pac Sci. 1962; 16:271-279.
- 771 67. Ibáñez CM, González C, Cubillos L. Dieta del pez espada *Xiphias gladius* Linnaeus, 1758, en  
772 aguas oceánicas de Chile central en invierno de 2003. Investigaciones marinas. 2004; 32(2) p  
773 113-120.
- 774 68. Castillo K, Ibáñez CM, González C, Chong J. Diet of swordfish, *Xiphias gladius* Linnaeus,  
775 1758 from different fishing zones off central-Chile during autumn 2004. Rev Biol Mar  
776 Oceanogr. 2007; 42(2):149-56.
- 777 69. Letelier S, Meléndez R, Carreño E, Lopez S, Barría P. Alimentación y relaciones tróficas del  
778 pez espada (*Xiphias gladius* Linnaeus, 1758), frente a Chile centro-norte durante 2005. Lat  
779 Am J Aquat Res. 2009; 37(1):107-19.
- 780 70. Barbieri MA, Canales C, Correa V, Donoso M, Casanga AG, Leiva B, et al. Development and  
781 present state of the swordfish, *Xiphias gladius*, fishery in Chile. NOAA Tech Rep NMFS.  
782 1998; 142 p 1-10.

- 783 71. Rosas-Luis R, Loor-Andrade P, Carrera-Fernández M., Pincay-Espinoza JE, Vincés-Ortega C,  
784 Chompo-y-Salazar L. Cephalopod species in the diet of large pelagic fish (sharks and  
785 billfishes) in Ecuadorian waters. *Fish Res.* 2016; 173 p 159-168.
- 786 72. Loor-Andrade P, Pincay-Espinoza J, Rosas-Luis R. Diet of the blue shark *Prionace glauca* in  
787 the Ecuadorian Pacific Ocean during the years 2013 to 2015. *J Appl Ichthyol.* 2017; 33(3) p  
788 558-562.
- 789 73. Yatsu A. The role of slender tuna, *Allothunnus fallai*, in the pelagic ecosystems of the South  
790 Pacific Ocean *Jpn J Ichthyol.* 1995; 41(4):367-377.
- 791 74. Watanabe H, Kubodera T, Yokawa K. Feeding ecology of the swordfish *Xiphias gladius* in the  
792 subtropical region and transition zone of the western North Pacific. *Mar Ecol Prog Ser.* 2009;  
793 396(1):111-22.
- 794 75. Bello G. Role of cephalopods in the diet of the swordfish, *Xiphias gladius*, from the eastern  
795 Mediterranean Sea. *B Mar Sci.* 1991; 49(1-2) p 312-324.
- 796 76. Salman A. The role of cephalopods in the diet of swordfish (*Xiphias gladius* Linnaeus, 1758)  
797 in the Aegean Sea (Eastern Mediterranean). *Bull Mar Sci.* 2004; 74(1) p 21-29.
- 798 77. Young J, Lansdell M, Riddoch S, Revill A. Feeding ecology of broadbill swordfish, *Xiphias*  
799 *gladius*, off eastern Australia in relation to physical and environmental variables. *Bull Mar*  
800 *Sci.* 2006; 79(3) p 793-809.
- 801 78. Fitch JE, Lavenberg RJ. *Marine food and game fishes of California*, 28, Univ California Press.  
802 1971.
- 803 79. Frey HW. *California's living marine resources and their utilization.* Sacramento California  
804 Dept Fish and Game. 1971; p 148.

- 805 80. Hyslop EJ. Stomach contents analysis - a review of methods and their application. J Fish  
806 Biol.1980; 17(4) pp 411-429.
- 807 81. Ivanova NV, Zemplak TS, Hanner RH, Hebert PDN. Universal primer cocktails for fish DNA  
808 barcoding. Mol Ecol Notes. 2007; 7:544–548.
- 809 82. Ratnasingham S, Hebert PDN. A DNA-based registry for all animal species: the Barcode  
810 Index Number (BIN) system. PLoS ONE. 2013; 8(8):e66213.  
811 DOI:10.1371/journal.pone.0066213.
- 812 83. Pierce GJ, Boyle PR. A review of methods for diet analysis in piscivorous marine mammals.  
813 Oceanogr Mar Biol Annu Rev. 1991; 29 pp 409-486.
- 814 84. Oksanen J, Blanchet F, Kindt R, Legendre P, O'Hara RG, Simpson G, et al. Vegan:  
815 community ecology package. R package, version 1.17-0. Accessible online: [http://CRAN.R-](http://CRAN.R-project.org/package=vegan)  
816 [project.org/package=vegan](http://CRAN.R-project.org/package=vegan). 2010.
- 817 85. R Development Core Team. R: A Language and Environment for Statistical Computing,  
818 Vienna, Austria: R Foundation for Statistical Computing. 2015.
- 819 86. Hurtubia J. Trophic diversity measurement in sympatric predatory species. Ecology. 1973;  
820 54(4):885-890.
- 821 87. Ferry LA, Cailliet GM. Sample size and data analysis: Are we characterizing and comparing  
822 diet properly? In: MacKinley D, Shearer K (eds) Feeding ecology and nutrition in fish.  
823 International Congress of the Biology of Fishes, American Fisheries. 1996.
- 824 88. Ferry LA, Clark SL, Cailliet GM. Food habits of spotted sand bass (*Paralabrax*  
825 *maculofasciatus*, Serranidae) from Bahia de Los Angeles, Baja California. Bull S Calif Acad  
826 Sci. 1997; 96(1):1-21.



- 827 89. Gelsleichter J, Musick JA, Nichols S. Food habits of the smooth dogfish, *Mustelus canis*,  
828 dusky shark, *Carcharhinus obscurus*, Atlantic sharp nose shark, *Rhizoprionodon terranovae*  
829 and the sand tiger, *Carcharias taurus*, from the northwest Atlantic Ocean. Environ Biol Fish.  
830 1999; 54:205-217.
- 831 90. Yamaguchi A, Taniuchi T. Food variation and ontogenetic dietary shifts of the star spotted  
832 dogfish *Mustelus manazo* at five locations in Japan and Taiwan. Fish Sci. 2000; 66:1039-1048.
- 833 91. Bizzarro JJ, Robinson HJ, Rinewalt CS, Ebert DA. Comparative feeding ecology of four  
834 sympatric skate species off central California, USA Environ Biol Fish. 2007; 80:197–220.
- 835 92. Pinkas L, Oliphant MS, Iverson ILK. Food habits of albacore, bluefin tuna, and bonito in  
836 California waters. Calif Dep Fish Game Fish Bull. 1971; 152:1-105.
- 837 93. Bowen SH. Quantitative description of the diet. In: Murphy BR, Willis DW (eds.) Fisheries  
838 Techniques. American Fisheries Society Bethesd. 1996; pp 513–532.
- 839 94. Assis CA. A generalized index for stomach contents analysis in fish. Sci Mar. 1996;  
840 60(23):385-389.
- 841 95. Preti A, Soykan CU, Dewar H, Wells RD, Spear N, Kohin S. Comparative feeding ecology of  
842 shortfin mako, blue and thresher sharks in the California Current. Env Biol Fish. 2012; 95(1) p  
843 127-146.
- 844 96. Thayer JA, Field JC, Sydeman WJ. Changes in California chinook salmon diet over the past  
845 50 years: relevance to the recent population crash. Mar Ecol Prog Ser. 2014; 498 pp 249-261.
- 846 97. Tripp-Valdez A, Galvan-Magaña F, Ortega-Garcia S. Food sources of common dolphinfish  
847 (*Coryphaena hippurus*) based on stomach content and stable isotopes analyses. J Mar Biol  
848 Assoc UK. 2015; 95(3) pp 579-591.

- 849 98. Liao H, Pierce CL, Larscheid JG. Empirical assessment of indices of prey importance in the  
850 diets of predacious fish. *Trans Am Fish Soc.* 2001; 130(4) pp 583-591.
- 851 99. George ADI, Abowei JFN, Inko-Tariah MB, Jasper A. The composition in different size  
852 groups and Index of Relative Importance (Iri) of *Callinectes amnicola* (De Rochebrune, 1883)  
853 Food from Okpoka Creek, Niger Delta, Nigeria. *Int J Anim Vet Adv.* 2009; 1(2) pp 83–91.
- 854 100. Newman SP, Handy RD, Gruber SH. Diet and prey preference of juvenile lemon sharks  
855 *Negaprion brevirostris*. *Mar Ecol Prog Ser.* 2010; 398 pp 221-234.
- 856 101. Cortés E. A critical review of methods of studying fish feeding based on analysis of stomach  
857 contents: application to elasmobranch fishes. *Can J Fish Aquat Sci.* 1997; 54:726-738.
- 858 102. Magurran AE. *Measuring Biological Diversity*. In: Blackwell, Oxford. 2004.
- 859 103. Orlóci L. An agglomerative method for classification of plant communities. *J Ecol.* 1967;  
860 55:193-205.
- 861 104. Cavalli-Sforza LL, Edwards AWF. Phylogenetic analysis: Models and estimation  
862 procedures. *Evolution.* 1967; 32:550-570.
- 863 105. Legendre P, Gallagher E. Ecologically meaningful transformations for ordination of species  
864 data. *Oecologia.* 2001; 129:271-280.
- 865 106. Wood SN. Thin-plate regression splines. *J Royal Stat Soc (B).* 2003; 65(1) 95-114.
- 866 107. Hastie T, Tibshirani RJ. *Generalized additive models*. New York: Chapman and Hall. 1990.
- 867 108. Zuur AF, Leno EN, Smith GM. *Analysing Ecological Data*, Springer. 2007; 680 p.
- 868 109. DeMartini EE, Uchiyama JH, Williams HA. Sexual maturity, sex ratio, and size composition  
869 of swordfish, *Xiphias gladius*, caught by the Hawaii-based pelagic longline fishery. *Fish*  
870 *Bull.* 2000; 98:489-506.

- 871 110. Aalbers SA, Bernal D, Sepulveda CA. The functional role of the caudal fin in the feeding  
872 ecology of the common thresher shark *Alopias vulpinus*. J Fish Biol. 2010; 76(7):1863-1868.
- 873 111. Schmidt FN, Zimmermann EA, Walsh F, Plumeyer C, Schaible E, Fiedler IA, et al. On the  
874 Origins of Fracture Toughness in Advanced Teleosts: How the Swordfish Sword's Bone  
875 Structure and Composition Allow for Slashing under Water to Kill or Stun Prey. Adv Sci.  
876 2019; 6(12), p 1900287.
- 877 112. Fitch JE. Swordfish, *Xiphias gladius*. In: Calif Dept Fish and Game California ocean  
878 fisheries resources to the year 1960. State Printer Sacramento. 1960; p 63-64.
- 879 113. Major PF. An aggressive encounter between a pod of whales and billfish. Sci Rep Whales  
880 Res Inst. 1979; 31 p 95-96.
- 881 114. Ruud JT. Do swordfish attack the large baleen whales? Norwegian Whaling Gazette. 1952; 4  
882 p 191.
- 883 115. Brown SG. Swordfish and whales. Norsk Hvaifangst-Tid. 1960; 48(8):345-51.
- 884 116. Jonsgård A. Three finds of swords from swordfish (*Xiphias gladius*) in the Antarctic fin  
885 whale (*Balaenoptera physalus* L.) Norsk Hvalfangst-Tid. 1962; 51(7):287-91.
- 886 117. Machida S. A swordfish sword found from a North Pacific sei whale. Sci Rep Whales Res  
887 Inst. 1970; 31:1979, 95-96.
- 888 118. Ohsumi S. Find of marlin spears from the Antarctic minke whales. Sci Rep Whales Res Inst.  
889 1973; 25:237-239.
- 890 119. Neilson JD, Perry RI. Diel vertical migrations of marine fishes: an obligate or facultative  
891 process? Adv Mar Biol. 1990; 26:115-168.
- 892 120. Abecassis M, Dewar H, Hawn D, Polovina J. Modeling swordfish daytime vertical habitat in  
893 the North Pacific Ocean from pop-up archival tags. Mar Ecol Prog Ser. 2012; 452:219-236.

- 894 121. Field JC, Baltz K, Phillips AJ, Walker WA. Range expansion and trophic interactions of the  
895 jumbo squid, *Dosidicus gigas*, in the California Current. CalCOFI Rep. 2007; 48:131-146.
- 896 122. Zeidberg LD, Robison BH. Invasive range expansion by the Humboldt squid, *Dosidicus*  
897 *gigas*, in the eastern North Pacific. Proc Natl Acad Sci USA. 2007; 104:12948-12950.
- 898 123. Jereb P, Roper CFE. Cephalopods of the world. An annotated and illustrated catalogue of  
899 cephalopod species known to date. Vol 2 Myopsid and Oegopsid squids. FAO Species  
900 Catalogue for Fishery Purposes. FAO Rome. 2010.
- 901 124. Roper CFE, Young RE. Vertical distribution of pelagic cephalopods. Smithson Contr Zool.  
902 1975; 209:1-51.
- 903 125. Anderson ME. Notes on cephalopods of Monterey Bay, California, with new records for the  
904 area. Veliger. 1977; 21(2):255–262.
- 905 126. Magnússon J. The deep scattering layer in the Irminger Sea J Fish Biol. 1996; 49 (Supp  
906 A):182-191.
- 907 127. Bailey KM, Francis RC, Stevens PR. The life history and fishery of Pacific whiting,  
908 *Merluccius productus*. CalCOFI Rep. 1982; 23: 81-98.
- 909 128. Okutani T, Kubodera T, Jefferts K. Diversity, distribution and ecology of gonatid squids in  
910 the subarctic Pacific: a review. Bull Ocean Res Inst Univ Tokyo. 1988; 26:159- 192.
- 911 129. Markaida U, Sosa-Nishizaki O. Food and feeding habits of jumbo squid *Dosidicus gigas*  
912 (Cephalopoda: Ommastrephidae) from the Gulf of California, Mexico. J Mar Biol Ass UK.  
913 2003; 83:507-522.
- 914 130. Gilly WF, Markaida U, Baxter CH, Block BA, Boustany A, Zeidberg L, et al. Vertical and  
915 horizontal migrations by the jumbo squid, *Dosidicus gigas* revealed by electronic tagging.  
916 Mar Ecol Prog Ser. 2006; 324:1-17.

- 917 131. Bjorkstedt E, Goericke R, McClatchie S, Weber E, Watson W, Lo N, et al. State of the  
918 California Current 2010- 2011: regionally variable responses to a strong (but fleeting?) La  
919 Niña. CalCOFI Rep. 2011; 52:1–33.
- 920 132. Robinson CJ, Gómez-Gutiérrez J, Markaida U, Gilly WF. Prolonged decline of jumbo squid  
921 (*Dosidicus gigas*) landings in the Gulf of California is associated with chronically low wind  
922 stress and decreased chlorophyll a after El Niño 2009–2010. Fish Res. 2016; 173 p 128-138.
- 923 133. Ralston S, Dorval E, Ryley L, Sakuma KM, Field JC. Predicting market squid (*Doryteuthis*  
924 *opalescens*) landings from pre-recruit abundance. Fish Res. 2018; 199 p 12-18.
- 925 134. Vojkovich M. The California fishery for market squid (*Loligo opalescens*). CalCOFI Rep  
926 39:55–60.
- 927 135. Zeidberg LD, Hamner WM, Nezlin NP, Henry A. The fishery of the California market  
928 squid, *Loligo opalescens* (Cephalopoda, Myopsida), from 1981-2003. Fish Bull. 2006;  
929 104:46-59.
- 930 136. Zeidberg LD, Butler JL, Ramon D, Cossio A, Stierhoff KL, Henry A. Estimation of  
931 spawning habitats of market squid (*Doryteuthis opalescens*) from field surveys of eggs off  
932 Central and Southern California. Mar Ecol. 2012; 33(3) p 326-336.
- 933 137. Barange M, Coetzee J, Takasuka A, Hill K, Gutierrez M, Oozeki Y, et al. Habitat expansion  
934 and contraction in anchovy and sardine populations. Prog Oceanogr. 2009; 83(1-4) p 251-  
935 260.
- 936 138. PFMC. Status of the Pacific Coast Coastal Pelagic Species Fishery and Recommended  
937 Acceptable Biological Catches. Stock Assessment and Fishery Evaluation for 2016. 2017;  
938 NOAA award No. NA10NMF4410014.

- 939 139. MacCall AD, Sydeman WJ, Davison PC, Thayer JA. Recent collapse of northern anchovy  
940 biomass off California. *Fish Res.* 2016; 175 87-94.
- 941 140. Thayer JA, MacCall AD, Sydeman WJ, Davison PC. California anchovy population remains  
942 low, 2012–2016 CalCOFI Rep. 2017; 58: 1–8.
- 943 141. Stierhoff KL, Zwolinski JP, Demer DA. Distribution, biomass, and demography of coastal  
944 pelagic fishes in the California Current Ecosystem during summer 2018 based on acoustic-  
945 trawl sampling. US Dep Comm NOAA Tech Memo. 2019; NMFS-SWFSC-613.
- 946 142. Stierhoff KL, Zwolinski JP, Demer DA. Distribution, biomass, and demography of coastal  
947 pelagic fishes in the California Current Ecosystem during summer 2019 based on acoustic-  
948 trawl sampling. US Dep Comm NOAA Tech Memo. 2020; NMFS-SWFSC-626.
- 949 143. McClatchie S, Hendy IL, Thompson AR, Watson W. Collapse and recovery of forage fish  
950 populations prior to commercial exploitation. *Geophys Res Lett.* 2017; 44(4) pp 1877-1885.
- 951 144. Thompson AR, Schroeder ID, Bograd SJ, Hazen EL, Jacox MG, Leising A, et al. State of  
952 the California Current 2018–19: A novel anchovy regime and a new marine heat wave?  
953 *CalCOFI Rep* 60:1–65.
- 954 145. Siple MC, Essington TE, Barnett LA, Scheuerell MD. Limited evidence for sardine and  
955 anchovy asynchrony: re-examining an old story. *Proc Royal Soc B.* 2020; 287(1922) p  
956 20192781 doi:10.1098/rspb.2019.2781.
- 957 146. Kuriyama PT, Zwolinski JP, Hill KT, Crone PR. Assessment of the Pacific sardine resource  
958 in 2020 for US management in 2020-2021. US Dep Comm, NOAA Tech Mem. 2020;  
959 NMFS-SWFSC-628.

- 960 147. Santos MB, German I, Correia D, Read FL, Cedeira JM, Caldas M, et al. Long-term  
961 variation in common dolphin diet in relation to prey abundance. *Mar Ecol Prog.* 2013;  
962 Ser 481 p 249-268.

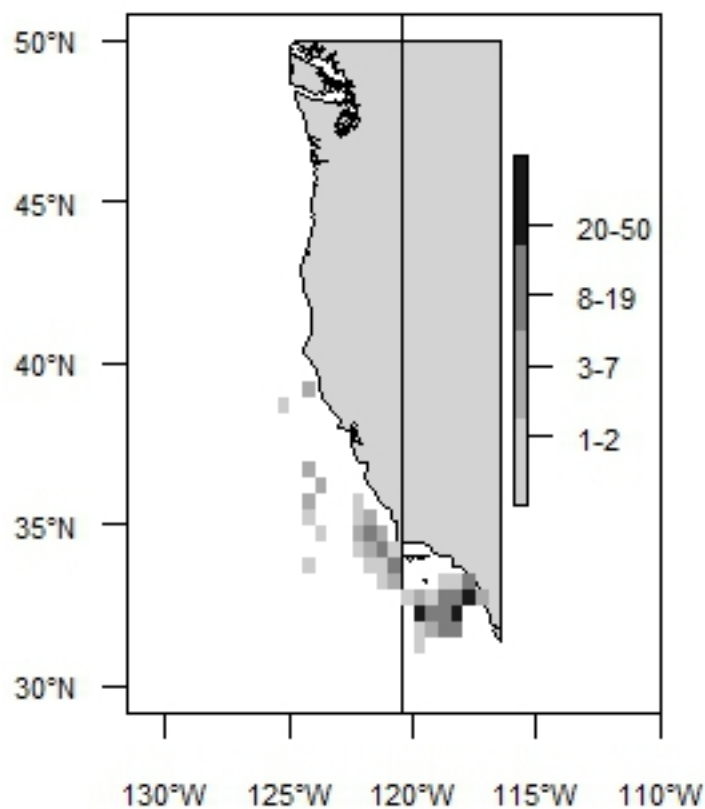

Figure



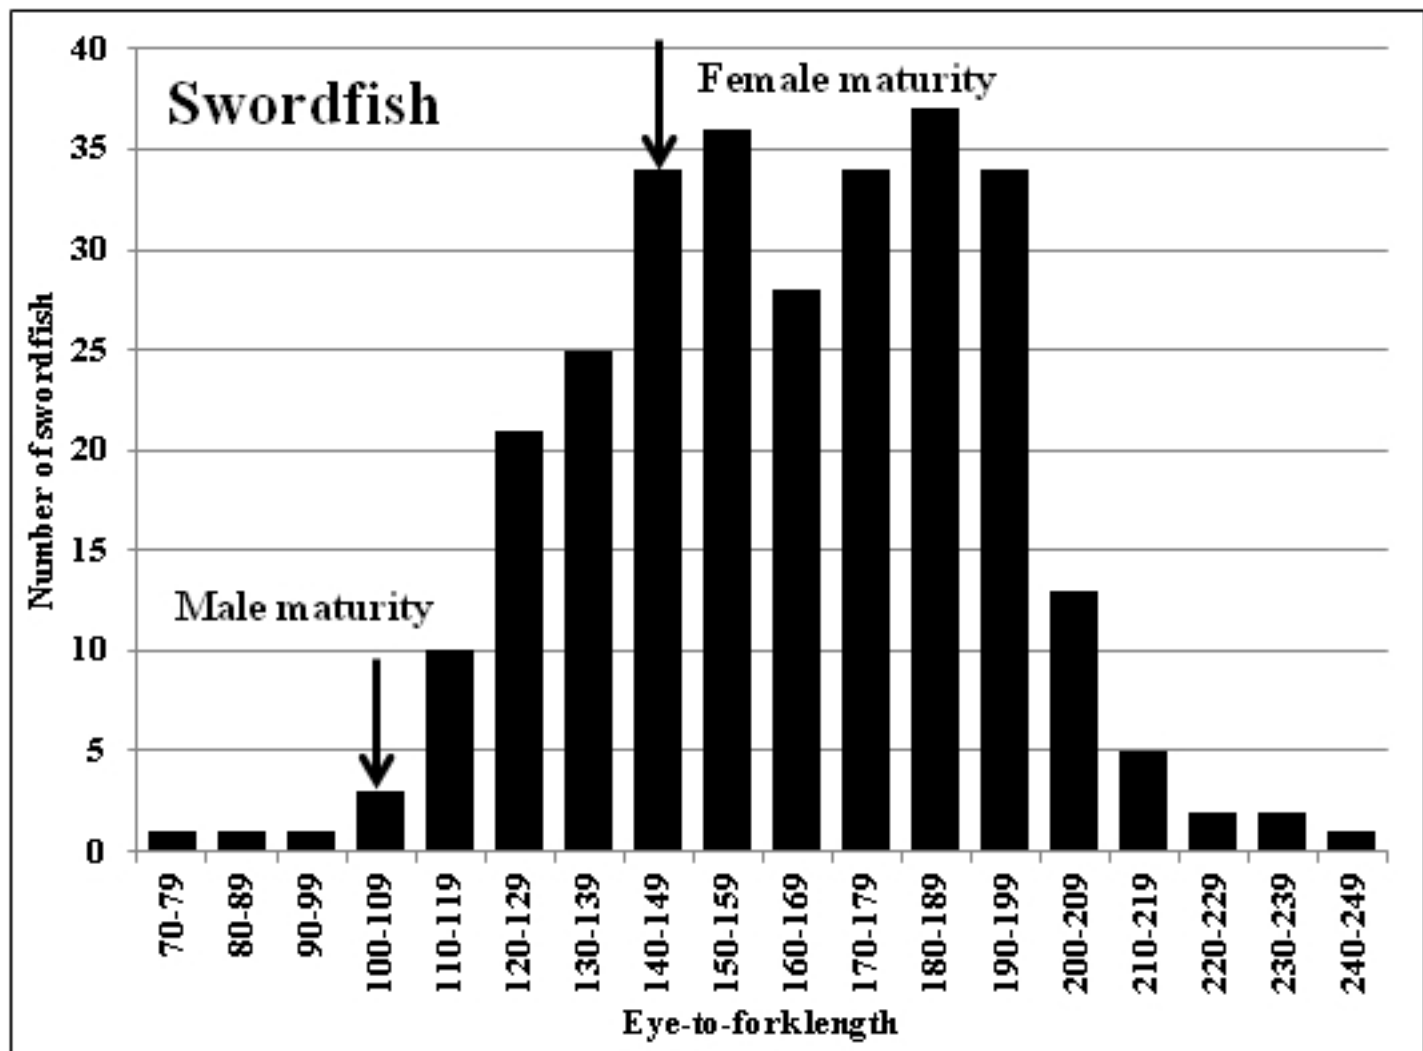

Figure

## Swordfish

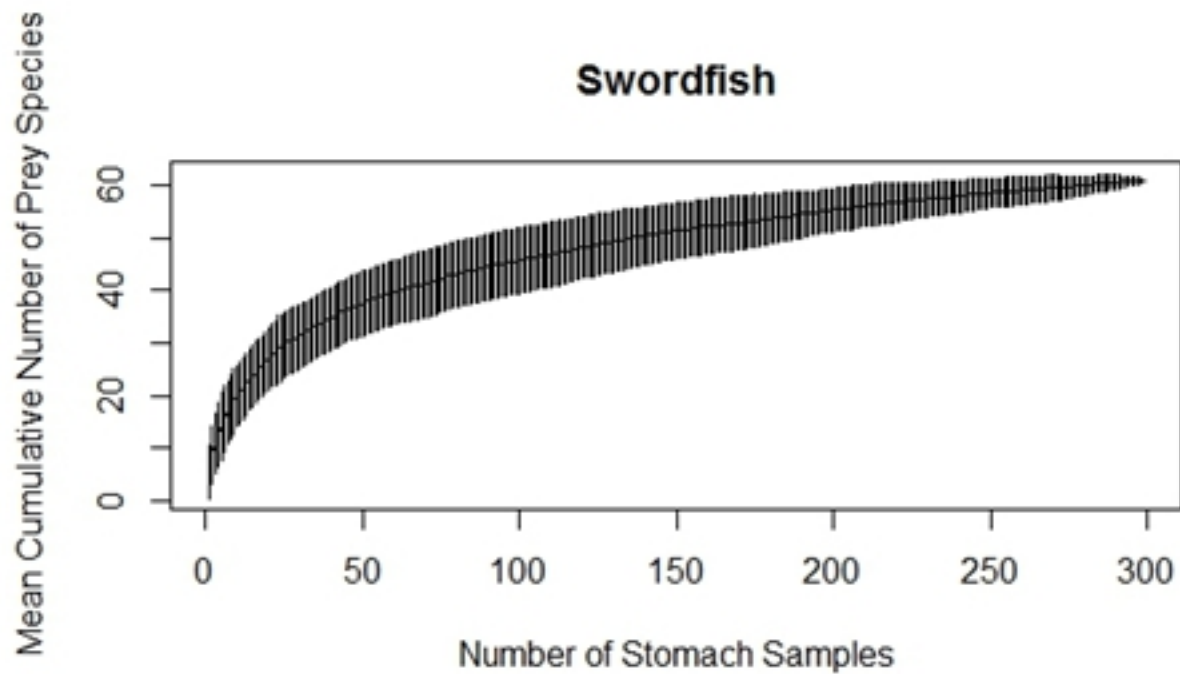

Figure

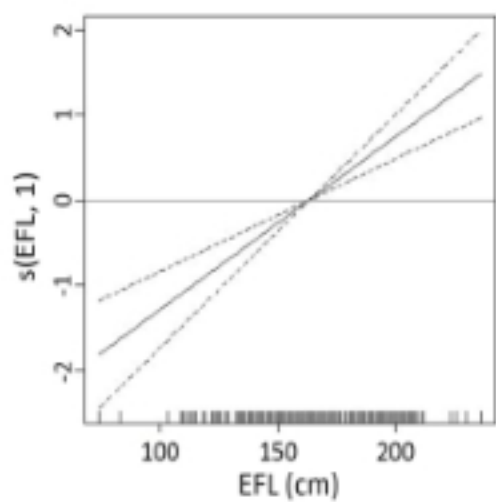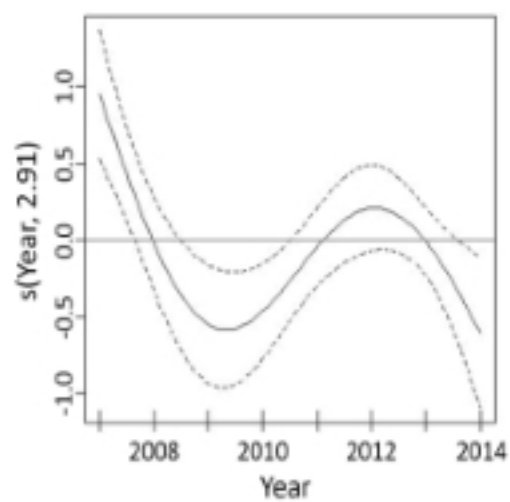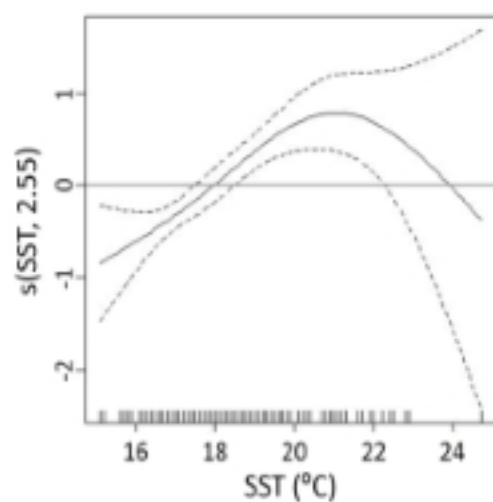

*a.* Jumbo squid

Figure

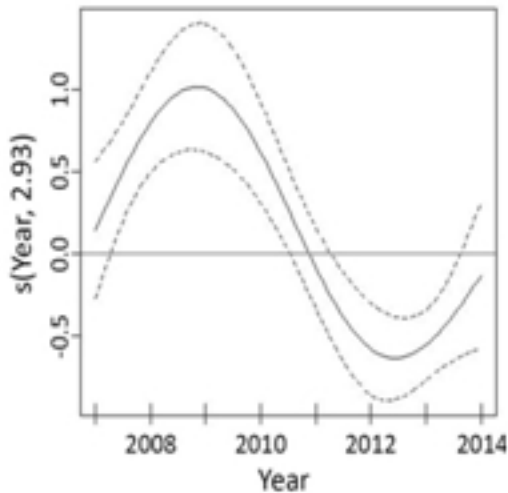

*b. Gonatopsis borealis*

Figure

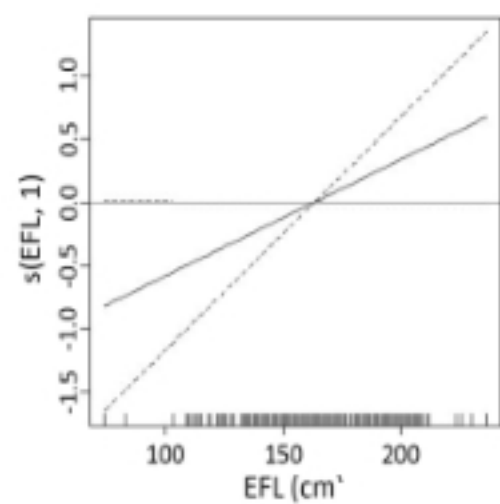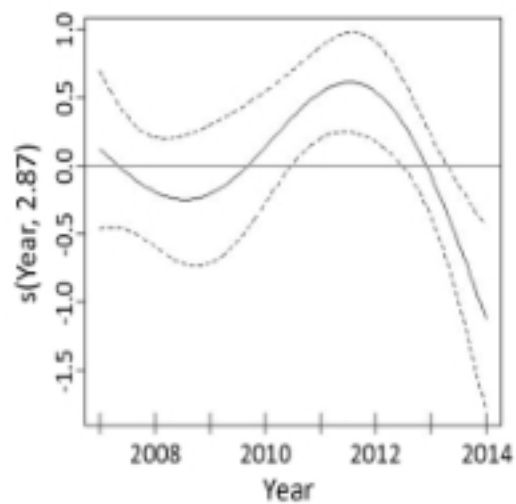

*c. Abraliopsis* sp.

Figure

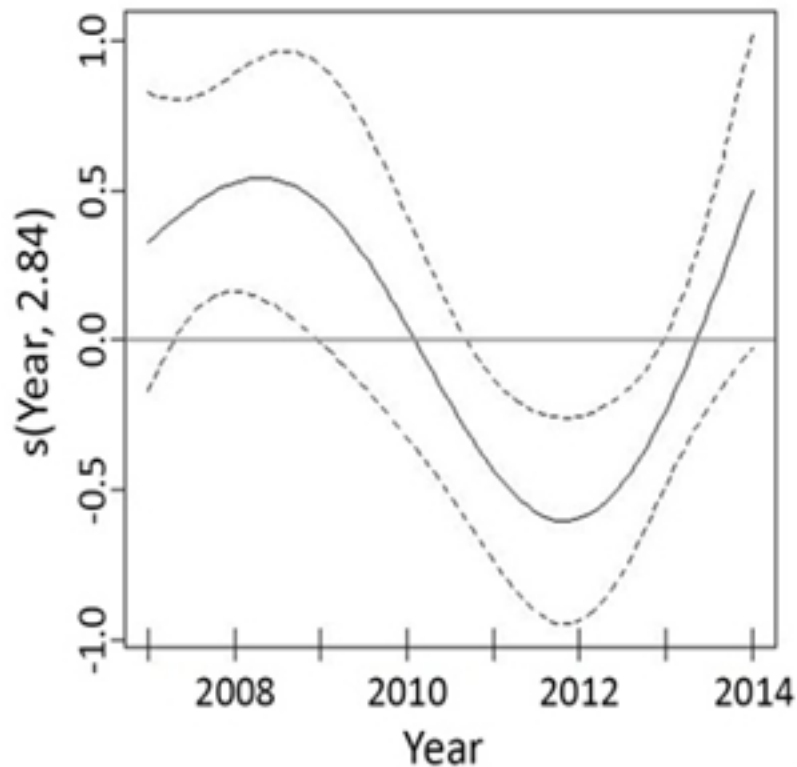

*d. Gonatus spp.*

Figure

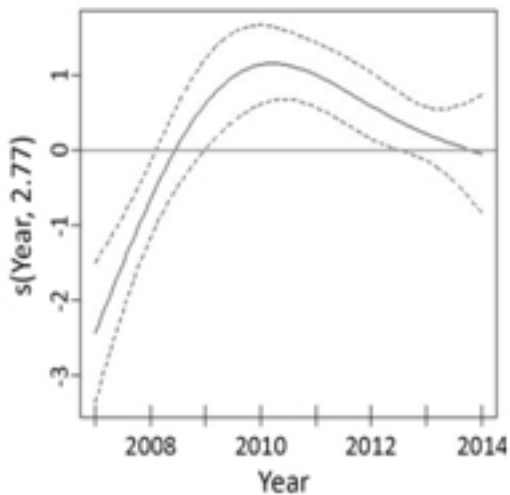

*e.* Market squid

Figure

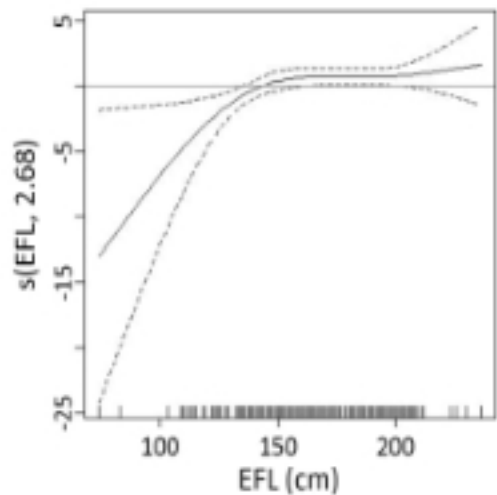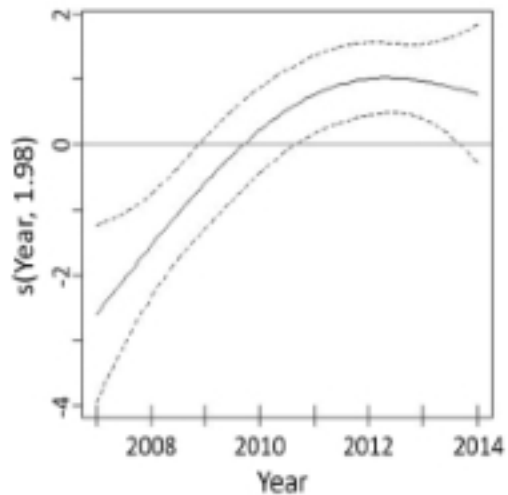

*f.* Pacific hake

Figure



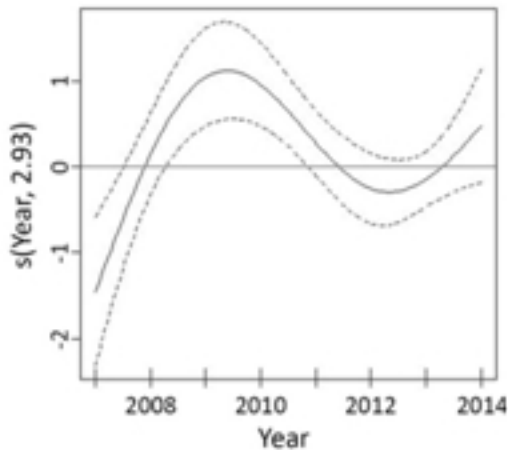

g. Duckbill barracudina

Figure
